## **Senescent cells inhibit muscle differentiation via the SASP-lipid 15d-PGJ<sub>2</sub> mediated modification and control of HRas**

Swarang Sachin Pundlik<sup>1,2</sup>, Alok Barik<sup>1</sup>, Ashwin Venkateshvaran<sup>1</sup>, Snehasudha Subhadarshini Sahoo<sup>1,3</sup>, Mahapatra Anshuman Jaysingh<sup>4,5</sup>, Raviswamy G H Math<sup>6</sup>, Arvind Ramanathan<sup>1,\*</sup>

1. Metabolic Regulation of Cell Fate (RCF), Institute for Stem Cell Science and Regenerative Medicine (InStem), Bangalore Life Science Cluster, GKVK-Post, Bellary Road, Bengaluru, Karnataka-560065, India.
2. Manipal Academy of Higher Education (MAHE), Tiger Circle Road, Madhav Nagar, Manipal, Karnataka-576104, India.
3. University of North Carolina at Chapel Hill, 216 Lenoir Dr, Chapel Hill, North Carolina-27599 U. S. A.
4. Department of Biological Sciences, Indian Institute of Science Education and Research Kolkata (IISER-K), Campus Road, Mohanpur, West Bengal-741246, India.
5. Division of Biology and Biomedical Sciences, Washington University in St Louis, 1 Brookings Dr, St. Louis, Missouri-63130, U. S. A.
6. National Centre for Biological Sciences (NCBS), Rajiv Gandhi Nagar, Kodigehalli, Bengaluru, Karnataka-560065, India.

\* All correspondence should be written to Dr. Arvind Ramanathan at [arvind@instem.res.in](mailto:arvind@instem.res.in)

## 1 **Abstract**

2 Senescent cells, which are characterized by multiple features such as increased  
3 expression of Senescence-Associated  $\beta$ -galactosidase activity (SA  $\beta$ -gal) and cell  
4 cycle inhibitors such as p21 or p16, accumulate with tissue damage and dysregulate  
5 tissue homeostasis. In the context of skeletal muscle, it is known that agents used for  
6 chemotherapy such as Doxorubicin cause buildup of senescent cells, leading to the  
7 inhibition of tissue regeneration. Senescent cells influence the neighboring cells via  
8 numerous secreted factors which form the senescence-associated secreted  
9 phenotype (SASP). Lipids are emerging as a key component of SASP that can control  
10 tissue homeostasis. Arachidonic acid-derived lipids have been shown to accumulate  
11 within senescent cells, specifically 15d-PGJ<sub>2</sub>, which is an electrophilic lipid produced  
12 by the non-enzymatic dehydration of the prostaglandin PGD<sub>2</sub>. In this study, we show  
13 that 15d-PGJ<sub>2</sub> is also released by Doxorubicin-induced senescent cells as a SASP  
14 factor. Treatment of skeletal muscle myoblasts with the conditioned medium from  
15 these senescent cells inhibits myoblast fusion during differentiation. Inhibition of L-  
16 PTGDS, the enzyme that synthesizes PGD<sub>2</sub>, diminishes the release of 15d-PGJ<sub>2</sub> by  
17 senescent cells and restores muscle differentiation. We further show that this lipid  
18 post-translationally modifies Cys184 of HRas in skeletal muscle cells, causing a  
19 reduction in the localization of HRas to the Golgi, increased HRas binding to RAF  
20 RBD, and activation of cellular MAPK-Erk signaling (but not the Akt signaling).  
21 Mutating C184 of HRas prevents the ability of 15d-PGJ<sub>2</sub> to inhibit the differentiation  
22 of muscle cells and control the activity of HRas. This work shows that 15d-PGJ<sub>2</sub>  
23 released from senescent cells could be targeted to restore muscle homeostasis after  
24 chemotherapy.

## 25 **Introduction**

26 Senescent cells are important drivers of aging and damage-associated loss of tissue  
27 homeostasis(Childs et al., 2015). Anti-cancer chemotherapy presents an important  
28 context where treatment with chemotherapeutics such as Doxorubicin (Doxo) causes  
29 widespread cellular senescence which inhibits tissue homeostasis and regeneration,  
30 including in skeletal muscles(Francis et al., 2022). It has been shown that Doxo causes  
31 systemic inflammation and leads to the emergence of senescent cells across  
32 tissues(Di Leonardo et al., 1994; Hu and Zhang, 2019; Robles and Adami, 1998).  
33 Senescent cells negatively affect tissue homeostasis and regeneration by releasing  
34 factors including proteins like growth factors, matrix metalloproteases, cytokines, and  
35 chemokines, and small molecules like fatty acid derivatives(Campisi, 2005; Coppé et  
36 al., 2010; Dilley et al., 2003; Krtolica et al., 2001; Parrinello et al., 2005; Shelton et al.,  
37 1999; Yang et al., 2006). The release of these factors from senescent cells is called  
38 the Senescence-Associated Secretory Phenotype (SASP). It is expected that these  
39 SASP factors and their mechanisms of action will vary depending on cellular and tissue  
40 contexts. Identifying SASP factors and their underlying mechanistic targets will be  
41 critical for building an understanding of how senescent cells control tissue  
42 homeostasis(Coppé et al., 2010; Davalos et al., 2010). Lipids are a less explored  
43 family of SASP factors, and it is important to understand how they affect tissue  
44 regeneration(Hamsanathan and Gurkar, 2022). We have previously shown that  
45 senescent cells have increased intracellular levels of prostaglandin 15d-PGJ<sub>2</sub>(Wiley et  
46 al., 2021), a non-enzymatic dehydration product of prostaglandin PGD<sub>2</sub>(Shibata et al.,  
47 2002). In the context of skeletal muscle, PGD<sub>2</sub> and 15d-PGJ<sub>2</sub> have been shown to  
48 negatively regulate muscle differentiation via mechanisms that do not depend on a  
49 cognate receptor(Hunter et al., 2001; Veliça et al., 2010). Here we study the role of  
50 15d-PGJ<sub>2</sub> as a member of the SASP and identify the mechanisms by which it might  
51 negatively affect muscle regeneration. 15d-PGJ<sub>2</sub> has been previously shown to  
52 covalently modify multiple proteins like MAPK1, MCM4, EIF4A-I, PKM1, GFAP etc. in  
53 endothelial and neuronal cells(Marcone and Fitzgerald, 2013; Yamamoto et al., 2011).  
54 15d-PGJ<sub>2</sub> was shown to be covalently modifying HRas in NIH3T3, Cos1, and IMR90  
55 cell lines(Luis Oliva et al., 2003; Wiley et al., 2021). We further studied HRas as an  
56 important target that might mediate the effects of 15d-PGJ<sub>2</sub> on muscle differentiation  
57 via covalent modification. We investigated HRas as a possible effector of 15d-PGJ<sub>2</sub>

58 because (i) HRas belongs to the Ras superfamily of small molecule GTPases and is  
59 a known regulator of key cellular processes(Davis et al., 1983; Harvey, 1964; Kirsten  
60 and Mayer, 1967; Vetter and Wittinghofer, 2001). (ii) constitutively active HRas mutant  
61 (HRas V12) has been shown to inhibit the differentiation of myoblasts by inhibiting  
62 MyoD and Myogenin expression(Konieczny et al., 1989; Lassar et al., 1989; Olson,' et  
63 al., 1987; Van Der Burgt et al., 2007). (iii) Downstream signaling of HRas is important  
64 for muscle homeostasis as skeletal and cardiac myopathies are observed in  
65 individuals carrying constitutively active mutants of HRas(Engler et al., 2021;  
66 Konieczny et al., 1989; Lee et al., 2010; Olson,' et al., 1987; Scholz et al., 2009; Van  
67 Der Burgt et al., 2007). HRas is highly regulated by lipid modifications, it undergoes  
68 reversible palmitoylation and de-palmitoylation at C-terminal cysteines, which regulate  
69 the intracellular distribution and activity of HRas(Gutierrez et al., 1989; Lu and  
70 Hofmann, 1995; Rocks et al., 2005). In this study, we show that 15d-PGJ<sub>2</sub> is  
71 synthesized and released by senescent myoblasts upon treatment with Doxo. 15d-  
72 PGJ<sub>2</sub>, taken up by the myoblasts, covalently modifies HRas at cysteine 184 and  
73 activates it. We also show that previously reported inhibition of differentiation of  
74 myoblasts by 15d-PGJ<sub>2</sub> depends on HRas C-terminal cysteines, notably cysteine 184.  
75 This study provides a mechanism by which prostaglandins secreted as SASP inhibit  
76 the differentiation of myoblasts, affecting muscle homeostasis in patients undergoing  
77 chemotherapy.

## 78 **Results**

### 79 **Doxorubicin (Doxo) treatment induces senescence in mouse skeletal muscles** 80 **and C2C12 mouse myoblasts.**

81 Doxorubicin-mediated DNA damage has been shown to induce senescence in cells(Di  
82 Leonardo et al., 1994; Hu and Zhang, 2019; Robles and Adami, 1998). Therefore, we  
83 injected B6J mice intraperitoneally with Doxorubicin (Doxo) (5mg/kg) every 3 days for  
84 9 days and observed induction of DNA damage-mediated senescence in hindlimb  
85 skeletal muscles (Fig. S1A). We observed an increase in the expression of p21 and  
86 increased nuclear levels of the DNA damage marker  $\gamma$ H2A.X in mouse Gastrocnemius  
87 muscles (Fig. 1A and B). We also observed a significant increase in the mRNA levels  
88 of known senescence markers (p16 and p21), SASP factors (CXCL1, CXCL2, TNF1 $\alpha$ ,  
89 IL6, TGF $\beta$ 1) in skeletal muscles of mice treated with Doxo compared to that of mice

90 treated with saline (Fig. 1C). These observations suggest that there is induction of  
91 senescence in skeletal muscles of mice upon treatment with Doxo.

92 C2C12 cells have been shown to undergo senescence after DNA damage, as  
93 assessed by an increase in the levels of SA  $\beta$ -gal and known markers of SASP (IL1 $\alpha$ ,  
94 IL6, CCL2, CXCL2, CXCL10)(Moiseeva et al., 2022). We treated C2C12 myoblasts  
95 with Doxo (150 nM) and observed a significant increase in the size of the nuclei (Fig.  
96 1D), flattened cell morphology with an increase in the cell size (Fig. 1E), a significant  
97 increase in the mRNA levels of cell cycle inhibitor p21 and SASP factors IL6 and TGF $\beta$   
98 (Fig. 1F), a significant increase in the protein levels of p21 (Fig. 1G), and an increase  
99 in the levels of SA  $\beta$ -gal (Fig. 1H) in C2C12 cells treated with Doxo. These  
100 observations suggest that C2C12 cells undergo senescence upon treatment with  
101 Doxo.

### 102 **Doxo-mediated senescence induces synthesis and release of 15d-PGJ<sub>2</sub> in** 103 **C2C12 myoblasts and mouse skeletal muscle.**

104 Synthesis of prostaglandins by senescent cells has previously been reported(Wiley et  
105 al., 2021; Wiley and Campisi, 2021). Specifically, levels of PGD<sub>2</sub> and its metabolite  
106 15d-PGJ<sub>2</sub> have been shown to be significantly increased in senescent cells. Therefore,  
107 we measured the levels of mRNA of enzymes involved in the synthesis of PGD<sub>2</sub>/15d-  
108 PGJ<sub>2</sub> (PTGS1, PTGS2, and PTGDS), in the gastrocnemius muscle of mice after  
109 treatment with Doxo. We observed a significant increase in the mRNA levels of  
110 PTGS1, PTGS2, and PTGDS enzymes in the skeletal muscle of mice treated with  
111 Doxo (Fig. 1C). We also observed a time-dependent increase in the mRNA levels of  
112 PTGS1, PTGS2, PTGDS, and PTGES enzymes in C2C12 cells treated with Doxo  
113 compared to Day 0 (Fig. 1I). Expression of enzyme PTGES was elevated on Day 4,  
114 whereas the expression of Prostaglandin D synthase (PTGDS) increased only after  
115 Day 8, reaching maximum expression on Day 12. These observations suggest an  
116 increase in the synthesis of prostaglandins in senescent cells.

117 15d-PGJ<sub>2</sub> is a non-enzymatic dehydration product of PGD<sub>2</sub>(Shibata et al., 2002). We  
118 observed an increase in the mRNA levels of synthetic enzymes of 15d-PGJ<sub>2</sub> in  
119 senescent C2C12 cells. Therefore, we measured the levels of 15d-PGJ<sub>2</sub> released by  
120 senescent C2C12 cells using targeted mass spectrometry (Fig. S1C, D, E, and F). The  
121 concentration of 15d-PGJ<sub>2</sub> was quantified by monitoring the transition of the m/z of

122 ions from 315.100 → 271.100 using a SCIEX 6500 mass spectrometer. We plotted a  
123 standard curve using purified 15d-PGJ<sub>2</sub> (Fig. S1F) to quantify the concentration of 15d-  
124 PGJ<sub>2</sub>. We used the representative peaks from the conditioned medium collected from  
125 C2C12 cells incubated in 0.2% serum medium for 3 days (Quiescent cells) and C2C12  
126 cells treated with Doxo (150 nM) (Senescent cells) to measure the concentration of  
127 15d-PGJ<sub>2</sub> released by quiescent cells or senescent C2C12 cells. We observed a  
128 significant increase (~100 fold) in the concentration of 15d-PGJ<sub>2</sub> in the conditioned  
129 medium from senescent cells as compared to that in quiescent cells (Fig. 1J). This  
130 suggests that senescent C2C12 cells release 15d-PGJ<sub>2</sub> in the medium.

131 **Prostaglandin PGD<sub>2</sub> and its metabolites in the conditioned medium of senescent**  
132 **cells inhibit the differentiation of C2C12 myoblasts.**

133 15d-PGJ<sub>2</sub> (the final non-enzymatic dehydration product of PGD<sub>2</sub>) has been shown to  
134 inhibit the differentiation of myoblasts(Hunter et al., 2001). We observed the release  
135 of 15d-PGJ<sub>2</sub> by senescent cells, showing that 15d-PGJ<sub>2</sub> is a SASP factor (Fig. 1F).  
136 Conditioned medium of senescent cells inhibits the differentiation of myoblasts in  
137 myotonic dystrophy type 1(Conte et al., 2023). Therefore, we tested whether 15d-  
138 PGJ<sub>2</sub>, the terminal dehydration product of PGD<sub>2</sub>, is required for the inhibitory effect of  
139 SASP on the differentiation of myoblasts. We treated C2C12 myoblasts with the  
140 conditioned medium of senescent cells or senescent cells treated with 30 μM of AT-56  
141 (a well-characterized inhibitor of prostaglandin D synthase (PTGDS))(Hu et al., 2021;  
142 S. Hu et al., 2023; Shunfeng Hu et al., 2023; Irikura et al., 2009) and measured the  
143 differentiation of myoblasts by calculating the fusion index. We observed a significant  
144 decrease (~20%) in the fusion index of the C2C12 myoblasts treated with the  
145 conditioned medium of senescent cells (Fig. 2A), suggesting that SASP factors  
146 decrease the differentiation of myoblasts. This decrease in the inhibition was rescued  
147 in myoblasts treated with the conditioned medium of senescent cells treated with AT-  
148 56 (Fig. 2A). This suggests that prostaglandins PGD<sub>2</sub>/15d-PGJ<sub>2</sub> released by  
149 senescent cells as SASP factors can inhibit the differentiation of myoblasts.

150 **15d-PGJ<sub>2</sub> inhibits the proliferation and differentiation of mouse and human**  
151 **myoblasts.**

152 15d-PGJ<sub>2</sub> has been shown to affect the proliferation of cancer cell lines, both positively  
153 and negatively (Chen et al., 2003; Choi et al., 2020; Slanovc et al., 2024; Yen et al.,

154 2014). We measured the effect of 15d-PGJ<sub>2</sub> on the proliferation of C2C12 myoblasts.  
155 We treated C2C12 myoblasts with 15d-PGJ<sub>2</sub> (10 μM) or DMSO in DMEM 10% Serum  
156 medium for 72 hours and observed a significant decrease in the proliferation of C2C12  
157 cells after treatment with 15d-PGJ<sub>2</sub> (Fig. 2B). The doubling time of C2C12 cells was  
158 also increased upon treatment with 15d-PGJ<sub>2</sub> (57.24 hours) compared to DMSO  
159 (13.76 hours). This suggests that 15d-PGJ<sub>2</sub> decreases the proliferation of C2C12  
160 myoblasts.

161 We measured the differentiation of C2C12 mouse and primary human myoblasts after  
162 treatment with 15d-PGJ<sub>2</sub>. To rule out the toxic effects of 15d-PGJ<sub>2</sub> on cell physiology,  
163 we treated C2C12 cells with 15d-PGJ<sub>2</sub> (1 μM, 2 μM, 4 μM, 5 μM, and 10 μM) in the  
164 C2C12 differentiation medium, and measured the viability of cells after 24 hours of  
165 treatment, using an MTT viability assay. We judged that 15d-PGJ<sub>2</sub> was not cytotoxic  
166 up to 5 μM in the C2C12 differentiation medium (Fig. S2A). Based on this, we treated  
167 differentiating myoblasts with 15d-PGJ<sub>2</sub> (1 μM, 2 μM, and 4 μM) for 5 days to measure  
168 the effects of 15d-PGJ<sub>2</sub> treatment on differentiation of myoblasts. We observed a dose-  
169 dependent decrease in the mRNA levels of MyoD, MyoG, and MHC in differentiating  
170 C2C12 cells after treatment with 15d-PGJ<sub>2</sub> (Fig. 2C). There was a significant decrease  
171 in the no. of nuclei in individual MHC<sup>+ve</sup> fiber (~75%) in C2C12 cells treated with 15d-  
172 PGJ<sub>2</sub> (4 μM) compared to DMSO (Fig. 2D), suggesting a decrease in the fusion of  
173 myoblasts in myotubes. We also observed a dose-dependent decrease in the protein  
174 levels of MHC in differentiating primary human myoblasts upon treatment with 15d-  
175 PGJ<sub>2</sub> (Fig. 2E). Together, these observations suggest that 15d-PGJ<sub>2</sub> inhibits the  
176 differentiation of both mouse and human myoblasts.

### 177 **Biotinylated 15d-PGJ<sub>2</sub> covalently modifies HRas at Cysteine 184.**

178 15d-PGJ<sub>2</sub> has been shown to covalently modify several proteins including p53 and NF-  
179 κB, which are involved in several key biological processes (Marcone and Fitzgerald,  
180 2013). HRas was identified to be covalently modified by 15d-PGJ<sub>2</sub> at cysteine 184 in  
181 NIH3T3 and Cos1 cells (Luis Oliva et al., 2003). Therefore, we tested whether 15d-  
182 PGJ<sub>2</sub> could covalently modify HRas in C2C12 cells. We treated C2C12 cells  
183 expressing the EGFP-tagged wild-type HRas with biotinylated 15d-PGJ<sub>2</sub> (5 μM). We  
184 then immunoprecipitated biotinylated 15d-PGJ<sub>2</sub> using streptavidin. We observed a  
185 significant increase (~3.5 fold) in the pulldown of HRas upon treatment with 15d-PGJ<sub>2</sub>-

186 biotin compared to DMSO (Fig. 3A), suggesting an interaction between 15d-PGJ<sub>2</sub> and  
187 HRas. To measure the role of individual C-terminal cysteines in the binding of HRas  
188 with 15d-PGJ<sub>2</sub>, we treated C2C12 cells expressing the EGFP-tagged C181S and  
189 C184S mutants of HRas with biotinylated 15d-PGJ<sub>2</sub> (5 μM), and immunoprecipitated  
190 using streptavidin. We observed that the intensity of EGFP-tagged HRas was  
191 significantly decreased in cells expressing the C184S mutant (~80% decrease  
192 compared to HRas WT) but not in those expressing the C181S mutant (Fig. 3A). This  
193 suggests that 15d-PGJ<sub>2</sub> covalently modifies HRas at cysteine 184 in C2C12 cells.

194 **15d-PGJ<sub>2</sub> increases the FRET between EGFP-HRas and mCherry-RAF-RBD in**  
195 **wild-type and C181S mutant but not in the C184S mutant of HRas.**

196 We next tested the effect of covalent modification of HRas by 15d-PGJ<sub>2</sub> on HRas  
197 GTPase activity using FRET. mCherry-RAF-RBD is a well-characterized sensor of the  
198 activity of HRas. RAF-RBD binds to the activated HRas upon activation of HRas,  
199 allowing FRET between EGFP and mCherry(Rocks et al., 2005). We co-expressed  
200 EGFP-tagged HRas (EGFP-HRas) with mCherry-RAF-RBD in C2C12 myoblasts (Fig.  
201 3B). We measured the efficiency of FRET between EGFP and mCherry using an  
202 ImageJ plugin, FRET analyzer(Hachet-Haas et al., 2006). We compared the mean  
203 acceptor normalized FRET index in C2C12 myoblasts co-expressing EGFP-HRas WT  
204 and mCherry-RAF-RBD before and after treatment of 15d-PGJ<sub>2</sub> (10 μM) for 1 hour.  
205 We observed a significant increase (~30%) in the mean acceptor normalized FRET  
206 index upon treatment with 15d-PGJ<sub>2</sub> (Fig. 3C). This suggests that 15d-PGJ<sub>2</sub> activates  
207 HRas. To measure the role of individual C-terminal cysteines in 15d-PGJ<sub>2</sub> mediated  
208 activation of HRas, we co-expressed EGFP-HRas C181S or C184S with mCherry-  
209 RAF-RBD in C2C12 myoblasts. We measured the mean acceptor normalized FRET  
210 index before and after 1 hour of treatment with 15d-PGJ<sub>2</sub> (10 μM). We observed a  
211 significant increase (~40%) in the mean acceptor normalized FRET index in cells  
212 expressing EGFP-HRas C181S upon treatment with 15d-PGJ<sub>2</sub> but not in cells  
213 expressing EGFP-HRas C184S (Fig. 3D). These observations suggest that activation  
214 of HRas by 15d-PGJ<sub>2</sub> occurs in a cysteine 184 dependent manner.

215 **15d-PGJ<sub>2</sub> increases phosphorylation of Erk (Thr202/Tyr204) but not Akt (S473)**  
216 **in C2C12 myoblasts.**



217 HRas regulates two major downstream signaling pathways, the MAP kinase (MAPK)  
218 pathway and the PI3 kinase (PI3K) pathway (Pylayeva-Gupta et al., 2011). We tested  
219 the effects of treatment with 15d-PGJ<sub>2</sub> on these two downstream signaling pathways  
220 by measuring the phosphorylation of Erk (42 kDa and 44 kDa) and Akt proteins in  
221 C2C12 cells. We treated C2C12 cells with 15d-PGJ<sub>2</sub> (5 μM and 10 μM) or DMSO for  
222 1 hr (after 24 hrs. of serum starvation) and observed a dose-dependent increase in  
223 the phosphorylation of Erk (T202/Y204) (42 kDa) but not of Erk (44 kDa) (Fig. 3E). We  
224 did not observe an increase in the phosphorylation of Akt (S473) in C2C12 cells after  
225 treatment with 15d-PGJ<sub>2</sub> (Fig. S3C). These observations suggest that 15d-PGJ<sub>2</sub>  
226 activates the MAPK signaling pathway, but not the PI3K signaling pathway.

227 15d-PGJ<sub>2</sub> contains a reactive electrophilic center in its cyclopentenone ring, that can  
228 react with cysteine residues of proteins (Luis Oliva et al., 2003). We tested its role in  
229 activating the MAPK signaling pathway. We measured the phosphorylation of Erk  
230 (42kDa and 44 kDa) in C2C12 cells after treatment with cells with 9,10-dihydro-15d-  
231 PGJ<sub>2</sub> (10 μM), a 15d-PGJ<sub>2</sub> analog which is devoid of the electrophilic center, for 1 hr  
232 (after 24 hr. of serum starvation). We observed that the phosphorylation of Erk (42 kDa  
233 and 44 kDa) in C2C12 cells treated with 9,10-dihydro-15d-PGJ<sub>2</sub> was significantly  
234 reduced (~70%) as compared to the treatment with 15d-PGJ<sub>2</sub> (Fig. 3F). This shows  
235 that 15d-PGJ<sub>2</sub> activates the HRas-MAPK signaling pathway via the electrophilic center  
236 in its cyclopentenone ring.

237 **15d-PGJ<sub>2</sub> increases the localization of EGFP-tagged HRas at the plasma**  
238 **membrane compared to the Golgi in a C-terminal cysteine-dependent manner.**

239 15d-PGJ<sub>2</sub> covalently modifies cysteine 184 and activates HRas signaling (Fig. 3).  
240 Reversible palmitoylation of cysteine 181 and cysteine 184 in the C-terminal tail of  
241 HRas regulate intracellular distribution and signaling of HRas. Inhibition of  
242 palmitoylation of the C-terminal cysteine 181, either by a palmitoylation inhibitor 2-  
243 Bromopalmitate or by mutation to serine, causes accumulation of HRas at the Golgi  
244 compared to the plasma membrane and alters activity (Rocks et al., 2005). Therefore,  
245 we tested whether the modification of 15d-PGJ<sub>2</sub> alters the intracellular distribution of  
246 HRas. We co-expressed the EGFP-tagged wild type and the cysteine mutants of HRas  
247 (EGFP-HRas WT/C181S/C184S) with a previously reported marker of Golgi (Shaner  
248 et al., 2008) in C2C12 cells and stained the cells with plasma membrane marker WGA-

249 633 (Fig. 4A). We compared  $R_{\text{mean}}$ , the ratio of mean EGFP-HRas intensity at the Golgi  
250 to the mean HRas intensity at the plasma membrane, to measure the distribution of  
251 HRas between the plasma membrane and the Golgi. We measured the intracellular  
252 distribution of HRas between the Golgi and the plasma membrane in C2C12 cells after  
253 treatment with 15d-PGJ<sub>2</sub> (10  $\mu$ M) for 24 hours in DMEM 10% serum medium and  
254 observed a significant decrease (~20%) in the  $R_{\text{mean}}$  of C2C12 cells expressing the  
255 wild-type HRas after treatment with 15d-PGJ<sub>2</sub> (Fig. 4B). However, we did not observe  
256 a change in the  $R_{\text{mean}}$  of C2C12 cells expressing HRas C181S or HRas C184S after  
257 treatment with 15d-PGJ<sub>2</sub> (Fig. 4C). These observations suggest that 15d-PGJ<sub>2</sub>  
258 increases the localization of HRas at the plasma membrane as compared to that in  
259 the Golgi in an HRas C-terminal cysteine-dependent manner.

### 260 **15d-PGJ<sub>2</sub> mediated inhibition of differentiation of C2C12 cells is rescued by** 261 **C181S and C184S mutants of HRas.**

262 HRas inhibits the differentiation of C2C12 myoblasts(Engler et al., 2021; Konieczny et  
263 al., 1989; Lassar et al., 1989; Lee et al., 2010; Olson, et al., 1987; Scholz et al., 2009;  
264 Van Der Burgt et al., 2007).15d-PGJ<sub>2</sub> covalently modifies cysteine 184 and activates  
265 HRas (Fig. 3). Therefore, we tested whether the inhibition of myoblast differentiation  
266 by 15d-PGJ<sub>2</sub> depends on the activation of HRas signaling by modification of the C-  
267 terminal cysteine 184. We expressed the wild-type and the cysteine mutants of HRas  
268 (EGFP-HRas WT/C181S/C184S) in C2C12 myoblasts and treated the cells with 15d-  
269 PGJ<sub>2</sub> (4  $\mu$ M) or DMSO during differentiation. We observed a decrease in the levels of  
270 mRNA of MHC in C2C12 cells expressing HRas WT and HRas C181S after 5 days of  
271 treatment with 15d-PGJ<sub>2</sub>. We did not observe this in expressing HRas C184S (Fig.  
272 4D). We also observed a significant decrease in the protein levels of MHC in  
273 differentiating C2C12 cells expressing HRas WT and HRas C181S after treatment with  
274 15d-PGJ<sub>2</sub> (Fig. 4E). This decrease was partially rescued in cells expressing HRas  
275 C184S (Fig. 4E). These observations suggest that the inhibition of myoblast  
276 differentiation by 15d-PGJ<sub>2</sub> depends on modification of HRas C-terminal cysteine 184.

### 277 **Discussion**

278 Senescence is characterized by an irreversible arrest in cell proliferation(Hayflick,  
279 1965). Cells undergo senescence because of a myriad of stresses, including DNA  
280 damage, mitochondrial damage, and oncogene overexpression(Bihani et al., 2007,

281 2004; Casar et al., 2018; Chen and Ames, 1994; Chen et al., 1998; Coppé et al., 2008;  
282 D'Adda Di Fagagna, 2008; D'Adda Di Fagagna et al., 2003; Di Leonardo et al., 1994;  
283 Franza et al., 1986; Land et al., 1983; Robles and Adami, 1998; Serrano et al., 1997;  
284 Wiley et al., 2016; Woods et al., 1997). Senescent cells exhibit a multi-faceted  
285 physiological response, where they exhibit a flattened morphology, increase in cell  
286 size(Chen and Ames, 1994; Serrano et al., 1997), upregulation of tumor suppressor  
287 proteins(Calabrese et al., 2009; Lowe et al., 2004; Stein et al., 1990; Zindy et al.,  
288 2003), expression of neutral pH active  $\beta$ -galactosidase (SA  $\beta$ -gal)(Dimri et al., 1995;  
289 Lee et al., 2006), and altered metabolic state(Bittles and Harper, 1984; Jones et al.,  
290 2005; Wiley and Campisi, 2021, 2016; Zwerschke et al., 2003). Arachidonic acid  
291 metabolism is upregulated in senescent cells, which leads to increased synthesis of  
292 eicosanoid prostaglandins, which regulate the physiology of senescent cells(Wiley et  
293 al., 2021; Wiley and Campisi, 2021). Senescent cells exhibit a secretory phenotype  
294 (SASP) consisting of a variety of bioactive molecules including cytokines and  
295 chemokines, growth factors, matrix metalloproteases, etc(Coppé et al., 2008).  
296 Senescent cells influence the surrounding cells via the SASP factors, which regulate  
297 proliferation, migration, and other cell biological processes in the neighboring  
298 cells(Campisi, 2005). SASP-mediated perturbations in the microenvironment are  
299 implicated in several senescence-associate pathologies(Wiley and Campisi, 2021).  
300 Senescent fibroblasts increase the proliferation of premalignant and malignant  
301 epithelial cells(Krtolica et al., 2001). Conditioned medium of senescent fibroblasts  
302 promoted tumorigenesis in mouse keratinocytes(Dilley et al., 2003). Senescent  
303 fibroblasts transform pre-malignant breast cancer cells into invasive, tumor-forming  
304 cells(Parrinello et al., 2005). Senescence in muscle stem cells induces sarcopenia via  
305 activation of the p38 MAP kinase pathway and transient inhibition of the p38 MAP  
306 kinases rejuvenates aged muscle stem cells to ameliorate sarcopenia(Cosgrove et al.,  
307 2014). Senescent cells inhibit the differentiation of myoblasts by secretion of IL6 by  
308 senescent muscle stem cells in myotonic dystrophy(Conte et al., 2023).

309 In this study, we show that senescent myoblasts synthesize and release eicosanoid  
310 prostaglandin 15-deoxy- $\Delta^{12,14}$ -prostaglandin J<sub>2</sub> (15d-PGJ<sub>2</sub>) (Fig. 1I and J), the terminal  
311 non-enzymatic dehydration product of prostaglandin PGD<sub>2</sub>(Shibata et al., 2002). We  
312 used Doxorubicin (Doxo) to induce senescence in C2C12 myoblasts and showed that  
313 the conditioned medium of senescent C2C12 cells inhibits differentiation of C2C12

314 myoblasts (Fig. 2A). Inhibition of synthesis of PGD<sub>2</sub> by treatment of senescent cells  
315 with AT-56, a well-characterized inhibitor of prostaglandin D synthase(Hu et al., 2021;  
316 S. Hu et al., 2023; Shunfeng Hu et al., 2023; Irikura et al., 2009), rescued this inhibitory  
317 effect of the conditioned medium on the differentiation of myoblasts (Fig. 2A). A study  
318 has shown that prostaglandin PGD<sub>2</sub> inhibits differentiation of C2C12 myoblasts(Veliča  
319 et al., 2010), but the authors noted that knockout of DP1 and DP2 (the known receptors  
320 of prostaglandins PGD<sub>2</sub>) does not abrogate inhibition of differentiation of myoblasts by  
321 PGD<sub>2</sub>. This observation suggested that PGD<sub>2</sub> might inhibit the differentiation of  
322 myoblasts by a receptor-independent mechanism, possibly by its spontaneous non-  
323 enzymatic dehydration to 15d-PGJ<sub>2</sub>. 15d-PGJ<sub>2</sub> has been suggested to be an  
324 endogenous ligand of PPAR $\gamma$ (Li et al., 2019). However, the inhibition of PPAR $\gamma$  did not  
325 abrogate the inhibition of differentiation of C2C12 myoblasts by 15d-PGJ<sub>2</sub>, suggesting  
326 the existence of other possible mechanisms(Hunter et al., 2001). 15d-PGJ<sub>2</sub> has varied  
327 effects on cell physiology in a context-dependent manner. On one hand, 15d-PGJ<sub>2</sub>  
328 promotes tumorigenesis by inducing epithelial to mesenchymal transition in breast  
329 cancer cell line MCF7(Choi et al., 2020), 15d-PGJ<sub>2</sub> inhibits the proliferation of A549,  
330 H1299, and H23 lung adenocarcinoma cells via induction of ROS and activation of  
331 apoptosis(Slanovc et al., 2024). Here, we show that 15d-PGJ<sub>2</sub> inhibits the proliferation  
332 and the differentiation of C2C12 myoblasts (Fig. 2B, C and D).

333 15d-PGJ<sub>2</sub> contains an electrophilic cyclopentenone ring in its structure, allowing 15d-  
334 PGJ<sub>2</sub> to covalently modify and form Michael adducts with cysteine residues of  
335 proteins(Shibata et al., 2002). A previous proteomic study in endothelial cells showed  
336 biotinylated 15d-PGJ<sub>2</sub> covalently modified over 300 proteins, which regulate several  
337 physiological processes including cell cycle (MAPK1, MCM4), cell metabolism (Fatty  
338 acid synthase, Isocitrate dehydrogenase), apoptosis (PDCD6I), translation  
339 (Elongation factor 1 and 2, EIF4A-I), intracellular transport (Importin subunit  $\beta$ 1,  
340 Exportin 2, Kinesin 1 heavy chain)(Marcone and Fitzgerald, 2013). Another proteomic  
341 study in neuronal cells suggested that 15d-PGJ<sub>2</sub> modifies several proteins including  
342 chaperone HSP8A, glycolytic proteins Enolase 1 and 2, GAPDH, PKM1, cytoskeleton  
343 proteins Tubulin  $\beta$ 2b,  $\beta$  actin, GFAP, etc(Yamamoto et al., 2011). This study also  
344 showed modification of peptide fragments homologous to I $\kappa$ B kinase  $\beta$ , Thioredoxin,  
345 and a small molecule GTPase HRas. 15d-PGJ<sub>2</sub> has been shown to covalently modify  
346 HRas in NIH3T3 and Cos1 cells(Luis Oliva et al., 2003) and IMR90 cells(Wiley et al.,

2021). Modification by 15d-PGJ<sub>2</sub> led to the activation of HRas, judged by an increase in GTP-bound HRas. It is clear that 15d-PGJ<sub>2</sub> is capable of modifying numerous proteins in different contexts. Despite these observations, the functional relevance of these modifications in numerous contexts remains to be mapped. Here we focused on the role of 15d-PGJ<sub>2</sub> in the context of senescence and skeletal muscle differentiation. In this study, we showed that 15d-PGJ<sub>2</sub> covalently modifies HRas at cysteine 184 but not cysteine 181 in C2C12 myoblasts (Fig. 3A). We showed by FRET microscopy that modification of HRas by 15d-PGJ<sub>2</sub> in HRas WT and HRas C181S activates HRas in C2C12 cells, but 15d-PGJ<sub>2</sub> is unable to activate HRas C184S in this context (Fig. 3B, C, and D and Fig. S3A and B). This observation shows a direct link between the modification of HRas by 15d-PGJ<sub>2</sub> and the activation of HRas GTPase.

HRas activates two major downstream signaling pathways, the HRas-MAPK and the HRas-PI3K pathway (Pylayeva-Gupta et al., 2011). We showed that covalent modification of HRas by 15d-PGJ<sub>2</sub> via the electrophilic cyclopentenone ring activates HRas (Fig. 3C and D) and activates the HRas-MAPK pathway, demonstrated by an increase in the phosphorylation of Erk after treatment with 15d-PGJ<sub>2</sub> (Fig. 3E and F). However, we did not observe activation of the HRas-PI3K pathway, as we did not see an increase in the phosphorylation of Akt after treatment with 15d-PGJ<sub>2</sub> (Fig. S3C). MAPK and PI3K pathways are known regulators of muscle differentiation (Bennett and Tonks, 1997; Rommel et al., 1999), where inhibition of the RAF-MEK-Erk pathway or activation of the PI3K pathway promotes the differentiation of myoblasts. Preferential activation of the HRas-MAPK pathway over the HRas-PI3K pathway after treatment with 15d-PGJ<sub>2</sub> can be a possible mechanism by which 15d-PGJ<sub>2</sub> can inhibit the differentiation of myoblasts. HRas is known to regulate the differentiation of myoblasts in different contexts. Constitutively active HRas signaling by expression of oncogenic HRas mutant (HRas V12) leads to inhibition of differentiation of myoblasts (Konieczny et al., 1989; Lassar et al., 1989; Olson, et al., 1987; Van Der Burgt et al., 2007). Here we showed that the inhibition of differentiation of myoblasts after 15d-PGJ<sub>2</sub> is partially rescued in cells expressing the C184S mutant of HRas but not the wild type or the C181S mutant (Fig. 4D and E and S4E). HRas C184S did not get modified by 15d-PGJ<sub>2</sub> (Fig. 3A). These observations suggest that the inhibition of differentiation of myoblasts by 15d-PGJ<sub>2</sub> is partially dependent on the covalent modification of HRas by 15d-PGJ<sub>2</sub>.

380 Cysteine 181 and 184 in the C-terminal of HRas regulate the intracellular distribution  
381 of HRas between the plasma membrane and the Golgi by reversible palmitoylation  
382 and de-palmitoylation(Rocks et al., 2005). Inhibition of the palmitoylation of C-terminal  
383 cysteine 181, either by treatment with protein palmitoylation inhibitor 2-bromopalmitate  
384 or mutation of cysteine to serine, leads to accumulation of HRas at the Golgi.  
385 Intracellular localization of HRas maintains two distinct pools of HRas activity, where  
386 the plasma membrane pool shows a faster activation followed by short kinetics and  
387 the Golgi pool shows a slower activation but a sustained activation(Agudo-Ibáñez et  
388 al., 2015; Busquets-Hernández and Triola, 2021; Lorentzen et al., 2010; Rocks et al.,  
389 2005). We showed that the covalent modification of HRas by 15d-PGJ<sub>2</sub> alters the  
390 intracellular distribution of HRas. We showed that the covalent modification of HRas  
391 by 15d-PGJ<sub>2</sub> leads to an increase in the localization of the wild-type HRas at the  
392 plasma membrane compared to the Golgi (Fig. 4B). We did not observe any changes  
393 in the intracellular distribution of HRas C181S or HRas C184S after treatment with  
394 15d-PGJ<sub>2</sub> (Fig. 4C). HRas C184S is not modified by 15d-PGJ<sub>2</sub>, but HRas C181S is  
395 modified by 15d-PGJ<sub>2</sub> (Fig. 3A). This suggests that the intracellular redistribution of  
396 HRas due to covalent modification by 15d-PGJ<sub>2</sub> at cysteine 184 requires  
397 palmitoylation of cysteine 181.

398 Previous reports suggest that downstream signaling of HRas depends on the  
399 intracellular localization of HRas(Rocks et al., 2005; Santra et al., 2019). For example,  
400 targeted localization of HRas at the ER membrane induced expression of cell-  
401 migration genes. Localization of HRas at the plasma membrane showed a strong  
402 correlation with the expression of cell cycle genes, particularly the MAPK signaling  
403 pathway. Localization of HRas at the plasma membrane also showed a negative  
404 correlation with genes associated with the PI3K-Akt pathway. Here we showed that  
405 the intracellular distribution of HRas regulates differentiation of myoblasts. In order to  
406 show this, we used the constitutively active mutant of HRas (HRas V12) which has  
407 been shown to inhibit the differentiation of myoblasts(Engler et al., 2021; Konieczny et  
408 al., 1989; Lassar et al., 1989; Olson, et al., 1987; Scholz et al., 2009; Van Der Burgt  
409 et al., 2007). We expressed cysteine mutants of HRas V12 in C2C12 myoblasts and  
410 found that HRas V12 C181S localized predominantly at the Golgi whereas HRas V12  
411 and HRas V12 C184S localized at both the plasma membrane and the Golgi (Fig.  
412 S4A). When differentiated, we observed that C2C12 cells expressing HRas V12

413 C181S differentiated but HRas V12 or HRas V12 C184S did not differentiate (Fig. S4B,  
414 C, and D). These observations suggest alteration of intracellular distribution of HRas  
415 affects the HRas-mediated inhibition of the differentiation of myoblasts.

416 Doxorubicin (Doxo) is a widely used chemotherapy agent for the treatment of  
417 cancers(Johnson-Arbor and Dubey, 2022). Treatment with Doxo induces senescence.  
418 Doxo-mediated DNA damage leads to p53, p16, and p21-dependent senescence in  
419 human fibroblasts(Di Leonardo et al., 1994; Robles and Adami, 1998). On the other  
420 hand, treatment with doxorubicin leads to a decrease in muscle mass and cross-  
421 sectional area, leading to chemotherapy-induced cachexia(Hiensch et al., 2020).  
422 Several mechanisms have been proposed behind chemotherapy-induced cachexia,  
423 including the generation of reactive oxygen species(Gilliam and St. Clair, 2011),  
424 activation of proteases like calpain and caspases(Gilliam et al., 2012; Smuder et al.,  
425 2011), and impaired insulin signaling(de Lima Junior et al., 2016). This study provides  
426 a possible mechanism behind chemotherapy-induced loss of muscle mass and  
427 functioning. Induction of senescence in myoblasts by treatment with Doxo could lead  
428 to increased synthesis and release of 15d-PGJ<sub>2</sub> by senescent cells which could be  
429 taken up by myoblasts in the microenvironment. The lipid could covalently modify and  
430 activate HRas at cysteine 184 to inhibit the differentiation of myoblasts. Therefore,  
431 targeting the synthesis and release of 15d-PGJ<sub>2</sub> by senescent cells could serve as an  
432 important target to promote skeletal muscle homeostasis in cancer patients.

433 **Figures**

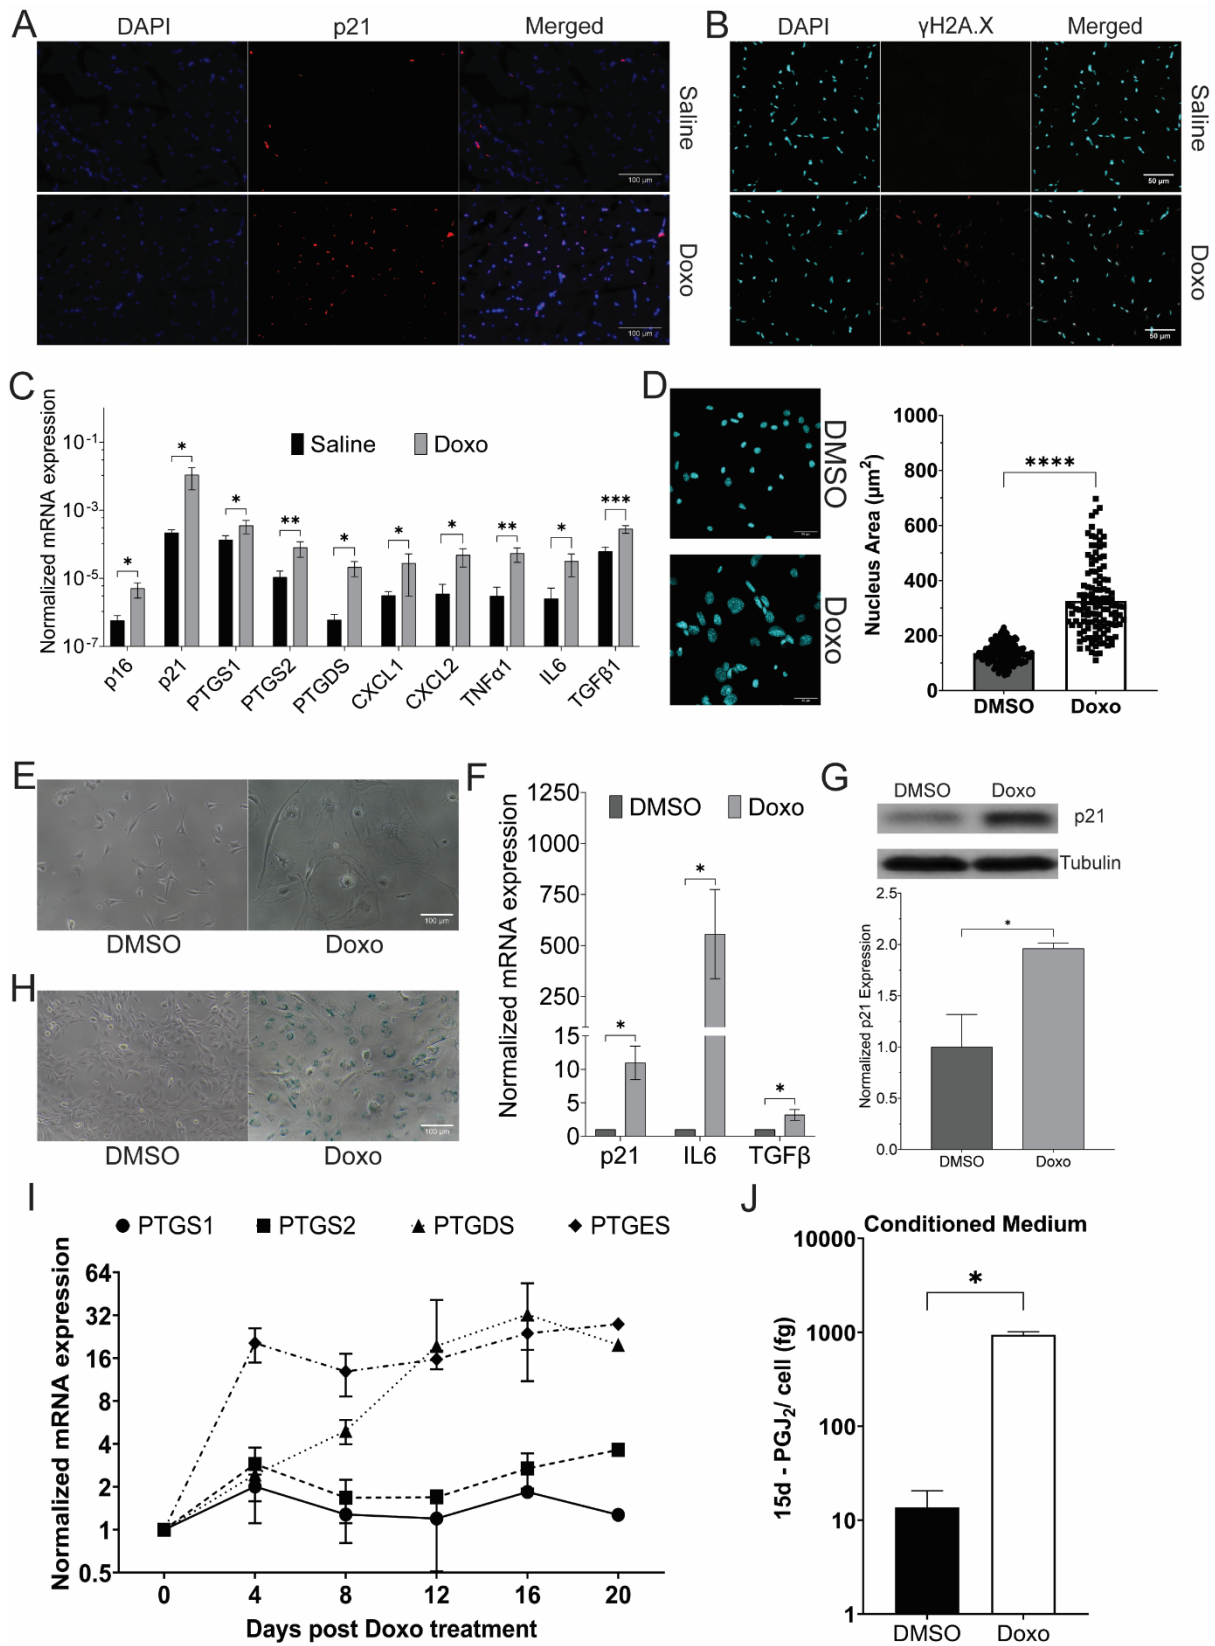

434

435 **Figure 1. Prostaglandin synthesis and release by Doxo-induced senescent**  
 436 **cells inhibits myoblast differentiation.**



- 437 A. Expression and localization of tumor suppressor protein p21, measured by  
438 immunofluorescence, in hindlimb skeletal muscles of mice after 11 days of  
439 treatment with Doxo (5 mg/kg) or Saline.
- 440 B. Representative confocal micrograph of expression of  $\gamma$ H2A.X in the  
441 gastrocnemius muscle of mice treated with Doxo (5 mg/kg) or Saline.
- 442 C. Expression of mRNAs of senescence markers (p16 and p21), SASP factors  
443 (CXCL1, CXCL2, TNF $\alpha$ 1, IL6, TGF $\beta$ 1), and enzymes involved in the  
444 biosynthesis of prostaglandin PGD<sub>2</sub>/15d-PGJ<sub>2</sub> (PTGS1, PTGS2, PTGDS),  
445 measured by qPCR, in hindlimb skeletal muscles of mice after 11 days of  
446 treatment with Doxo (5 mg/kg) or Saline.
- 447 D. A representative confocal micrograph and a scatter plot of the nuclear area of  
448 C2C12 myoblasts, measured by immunofluorescence, after 16 days of  
449 treatment with Doxo (150 nM) or DMSO.
- 450 E. A representative widefield micrograph of cell morphology in C2C12 myoblasts  
451 after 16 days of treatment with Doxo (150 nM) or DMSO.
- 452 F. Expression of mRNA of cell cycle inhibitor p21 and SASP factors (IL6 and  
453 TGF $\beta$ ), measured by qPCR, in C2C12 myoblasts after 16 days of treatment  
454 with Doxo (150 nM) or DMSO.
- 455 G. Expression of cell cycle inhibitor p21, measured by immunoblot, in C2C12  
456 myoblasts after 16 days of treatment with Doxo (150 nM) or DMSO.
- 457 H. Activity of Senescence Associated  $\beta$ -galactosidase (SA  $\beta$ -gal), measured by X-  
458 gal staining at pH~6, in C2C12 myoblasts after 16 days of treatment with Doxo  
459 (150 nM) or DMSO.
- 460 I. Expression of mRNAs of prostaglandin biosynthetic enzymes, measured by  
461 qPCR, in C2C12 myoblasts after treatment with Doxo (150 nM) or DMSO.
- 462 J. Concentration of 15d-PGJ<sub>2</sub> released from quiescent or senescent C2C12 cells.
- 463 (Statistical significance was tested by the two-tailed student's t-test ns=p>0.05,  
464 \*=p<0.05, \*\*=p<0.01, \*\*\*=p<0.001, \*\*\*\*=p<0.0001)

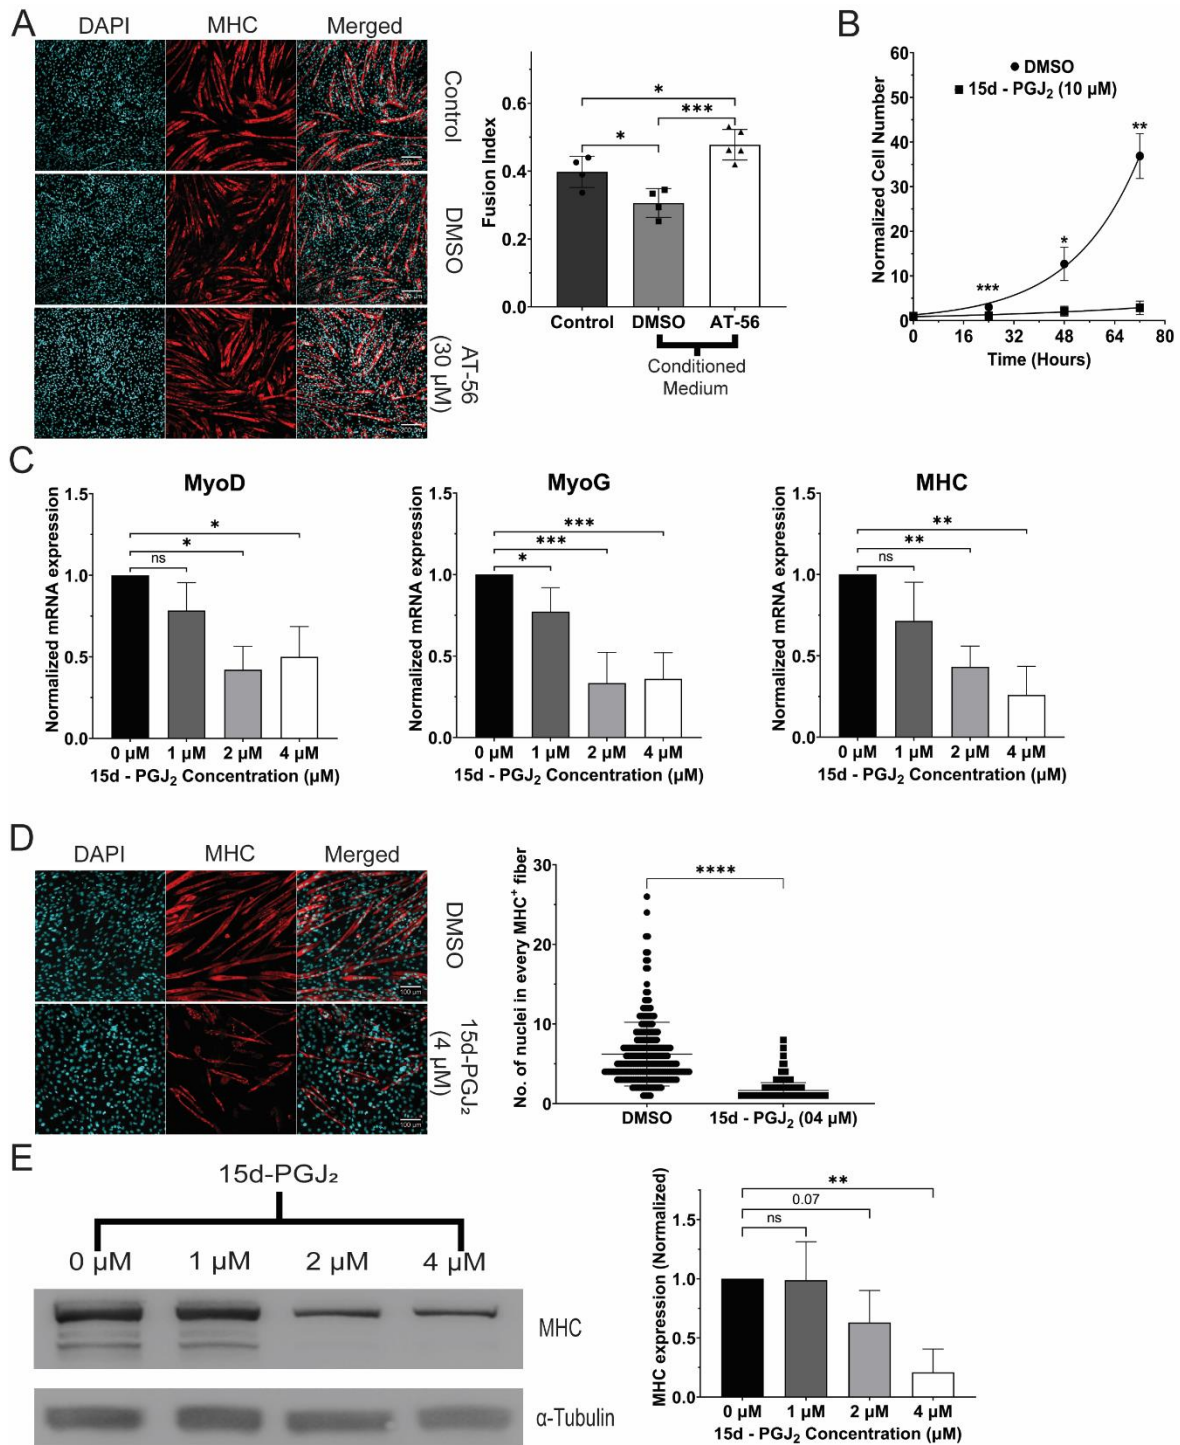

**Figure 2. 15d-PGJ<sub>2</sub> inhibits differentiation of myoblasts.**

A. Expression of MHC protein and the fusion of myoblasts in myotubes, measured by immunofluorescence, after treatment with conditioned medium of senescent cells treated with PTGDS inhibitor AT-56 (30  $\mu\text{M}$ ) or DMSO

B. Normalized number of C2C12 myoblasts treated with 15d-PGJ<sub>2</sub> (10  $\mu\text{M}$ ) or DMSO

465

466

467

468

469

470

471

472 C. Expression of mRNAs of markers of differentiation (MyoD, MyoG, and MHC),  
473 measured by qPCR, in C2C12 myoblasts treated with 15d-PGJ<sub>2</sub> (1 μM, 2 μM,  
474 or 4 μM) or DMSO.

475 D. Expression of MHC protein and the fusion of myoblasts in syncytial myotubes,  
476 measured by immunofluorescence, after treatment with 15d-PGJ<sub>2</sub> (4 μM) or  
477 DMSO.

478 E. Expression of MHC protein, measured by immunoblotting, in primary human  
479 skeletal myoblasts after treatment with 15d-PGJ<sub>2</sub> (1 μM, 2 μM, or 4 μM) or  
480 DMSO for 5 days.

481 (Statistical significance was tested by the two-tailed student's t-test ns=p>0.05,  
482 \*=p<0.05, \*\*=p<0.01, \*\*\*=p<0.001, \*\*\*\*=p<0.0001)

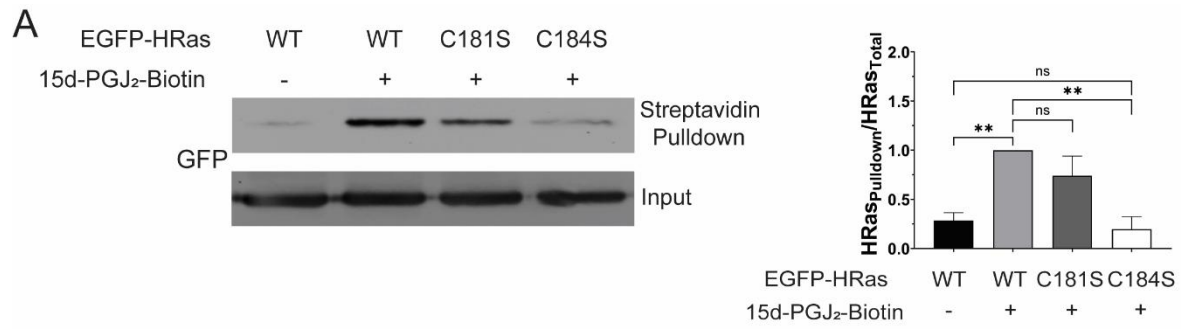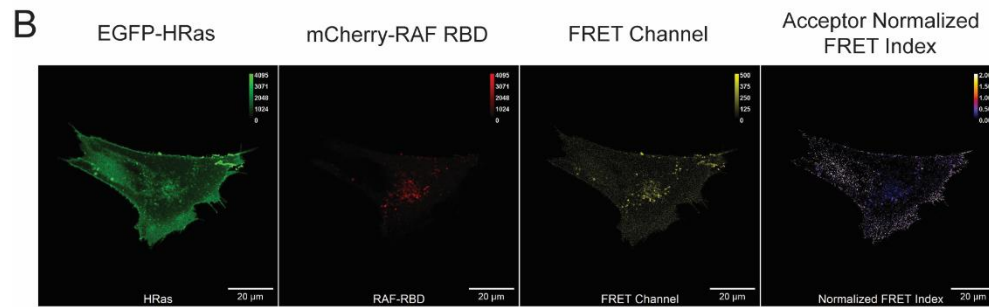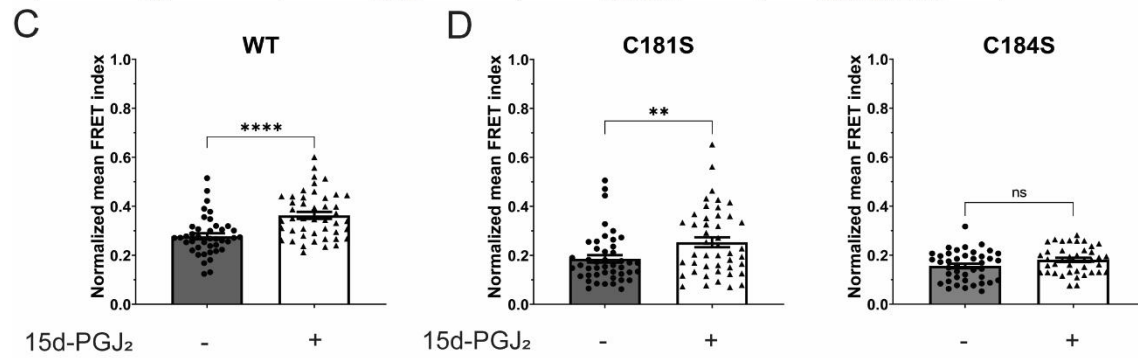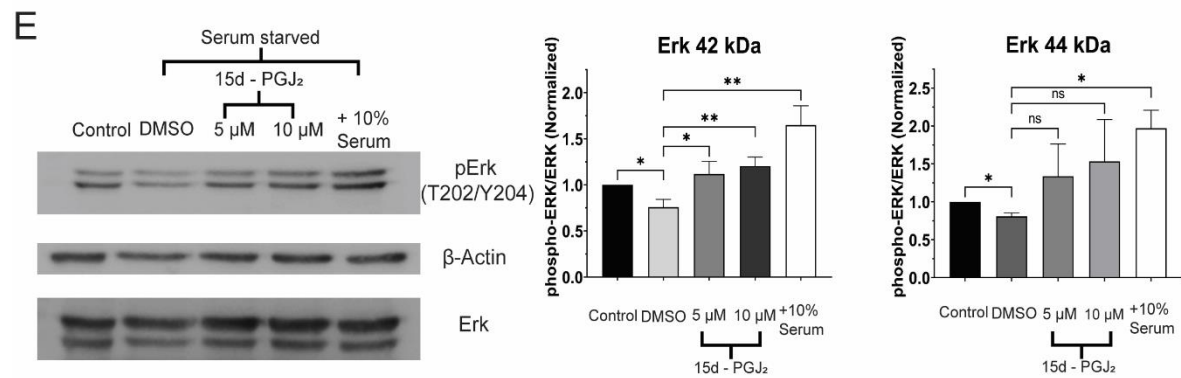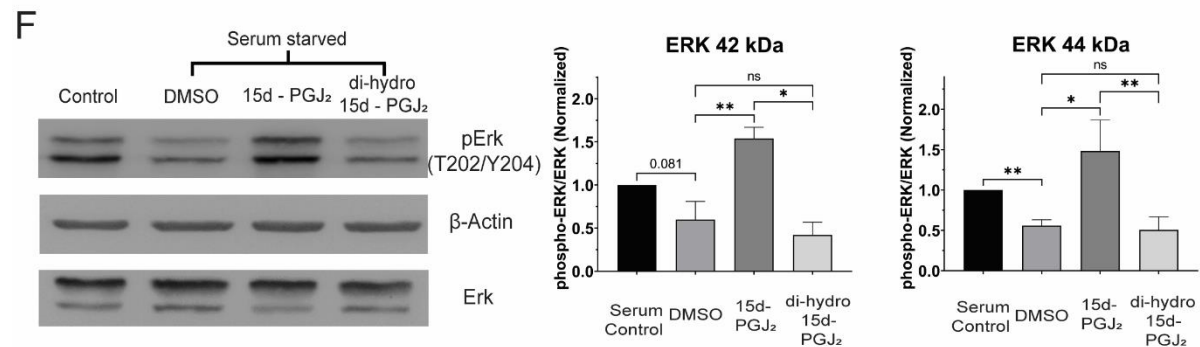

484 **Figure 3. 15d-PGJ<sub>2</sub> covalently modifies HRas at Cysteine 184 and activates the**  
485 **HRas-MAPK pathway via the electrophilic cyclopentenone ring.**

- 486 A. Streptavidin-immunoprecipitation of EGFP-HRas, measured by  
487 immunoblotting, in C2C12 cells after 3 hours of treatment with 15d-PGJ<sub>2</sub>-Biotin  
488 (5 μM).
- 489 B. Representative confocal micrograph of Fluorescence Resonance Energy  
490 Transfer (FRET) between EGFP-tagged HRas (EGFP-HRas) and mCherry-  
491 tagged Ras binding domain (RBD) of RAF kinase (mCherry-RAF RBD).
- 492 C. Activation of the EGFP-tagged wild type HRas (HRas WT), measured by FRET,  
493 before and after 1 hour of treatment with 15d-PGJ<sub>2</sub> (10 μM) after starvation for  
494 24 hours.
- 495 D. Activation of the EGFP-tagged C-terminal cysteine mutants of HRas (HRas  
496 C181S and HRas C184S), measured by FRET, before and after 1 hour of  
497 treatment with 15d-PGJ<sub>2</sub> (10 μM) after starvation for 24 hours.
- 498 E. Phosphorylation of Erk (42 kDa and 44 kDa), measured by immunoblotting, in  
499 C2C12 cells after 1 hour of treatment with 15d-PGJ<sub>2</sub> (5 μM, 10 μM) or DMSO  
500 after starvation for 24 hours.
- 501 F. Phosphorylation of Erk (42 kDa and 44 kDa), measured by immunoblotting, in  
502 C2C12 cells after 1 hour of treatment with 15d-PGJ<sub>2</sub> (10 μM)/ 9,10-dihydro-15d-  
503 PGJ<sub>2</sub> (10 μM) or DMSO after starvation for 24 hours.

504 (Statistical significance was tested by the two-tailed student's t-test ns=p>0.05,  
505 \*=p<0.05, \*\*=p<0.01, \*\*\*=p<0.001, \*\*\*\*=p<0.0001)

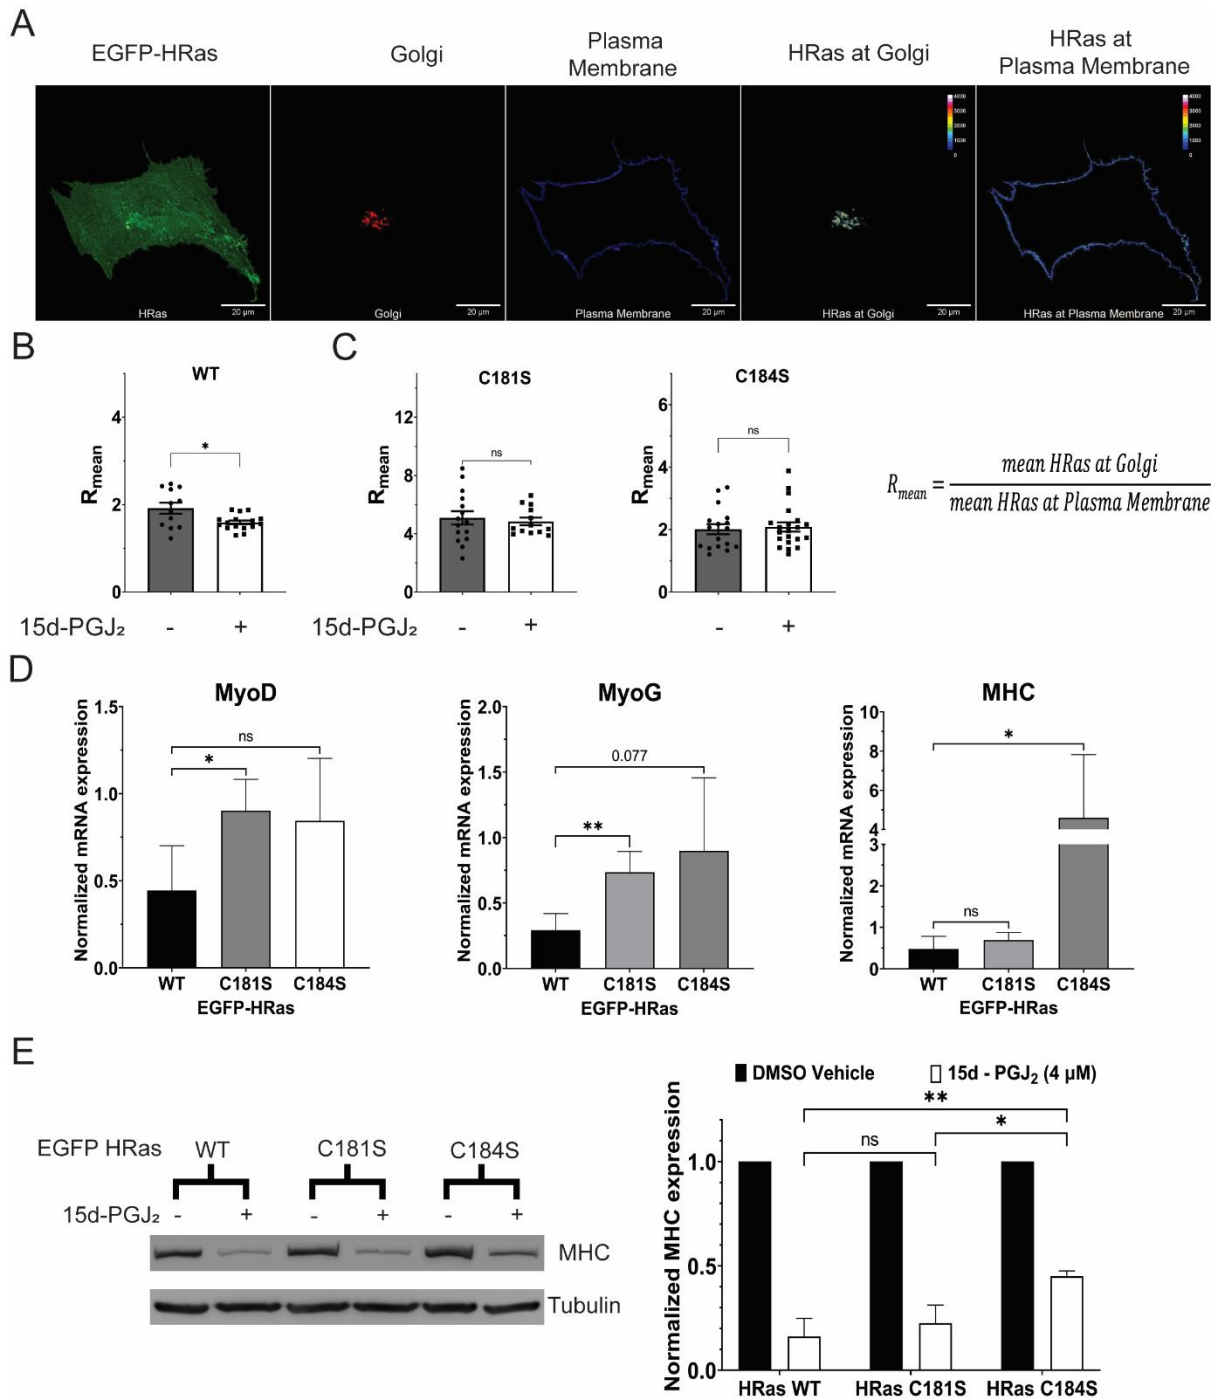

506

507

508

509

510

511

512

513

**Figure 4. 15d-PGJ<sub>2</sub> controls the intracellular distribution of HRas and differentiation of C2C12 cells in an HRas C-terminal cysteine-dependent manner.**

A. Representative confocal micrograph of C2C12 myoblasts showing localization of EGFP-tagged HRas between the plasma membrane (stained with Alexa Fluor 633 conjugated Wheat Germ Agglutinin) and the Golgi (labelled with TagRFP-tagged Golgi resident GalT protein). A statistic  $R_{\text{mean}}$  was defined as

514 the ratio of mean HRas intensity at the Golgi to the mean HRas intensity at the  
515 plasma membrane.

516 B. Distribution of the wild-type HRas between the Golgi and the plasma  
517 membrane, measured by  $R_{\text{mean}}$ , in C2C12 myoblasts treated with 15d-PGJ<sub>2</sub> (10  
518  $\mu\text{M}$ ) or DMSO for 24 hours.

519 C. Distribution of the C-terminal cysteine mutants of HRas between the Golgi and  
520 the plasma membrane, measured by  $R_{\text{mean}}$ , in C2C12 myoblasts treated with  
521 15d-PGJ<sub>2</sub> (10  $\mu\text{M}$ ) or DMSO for 24 hours.

522 D. Expression of mRNAs of known markers of differentiation (MyoD, MyoG, and  
523 MHC), measured by qPCR, in differentiating C2C12 myoblasts expressing the  
524 EGFP-tagged wild-type and the C-terminal cysteine mutants of HRas after  
525 treatment with 15d-PGJ<sub>2</sub> (4  $\mu\text{M}$ ) or DMSO for 5 days.

526 E. Expression of MHC protein, measured by immunoblotting, in differentiating  
527 C2C12 myoblasts expressing the EGFP-tagged wild-type and the C-terminal  
528 cysteine mutants of HRas after treatment with 15d-PGJ<sub>2</sub> (4  $\mu\text{M}$ ) or DMSO for 5  
529 days.

530 (Statistical significance was tested by the two-tailed student's t-test ns= $p>0.05$ ,  
531  $*=p<0.05$ ,  $**=p<0.01$ ,  $***=p<0.001$ ,  $****=p<0.0001$ )

532 **Supplementary Information:**

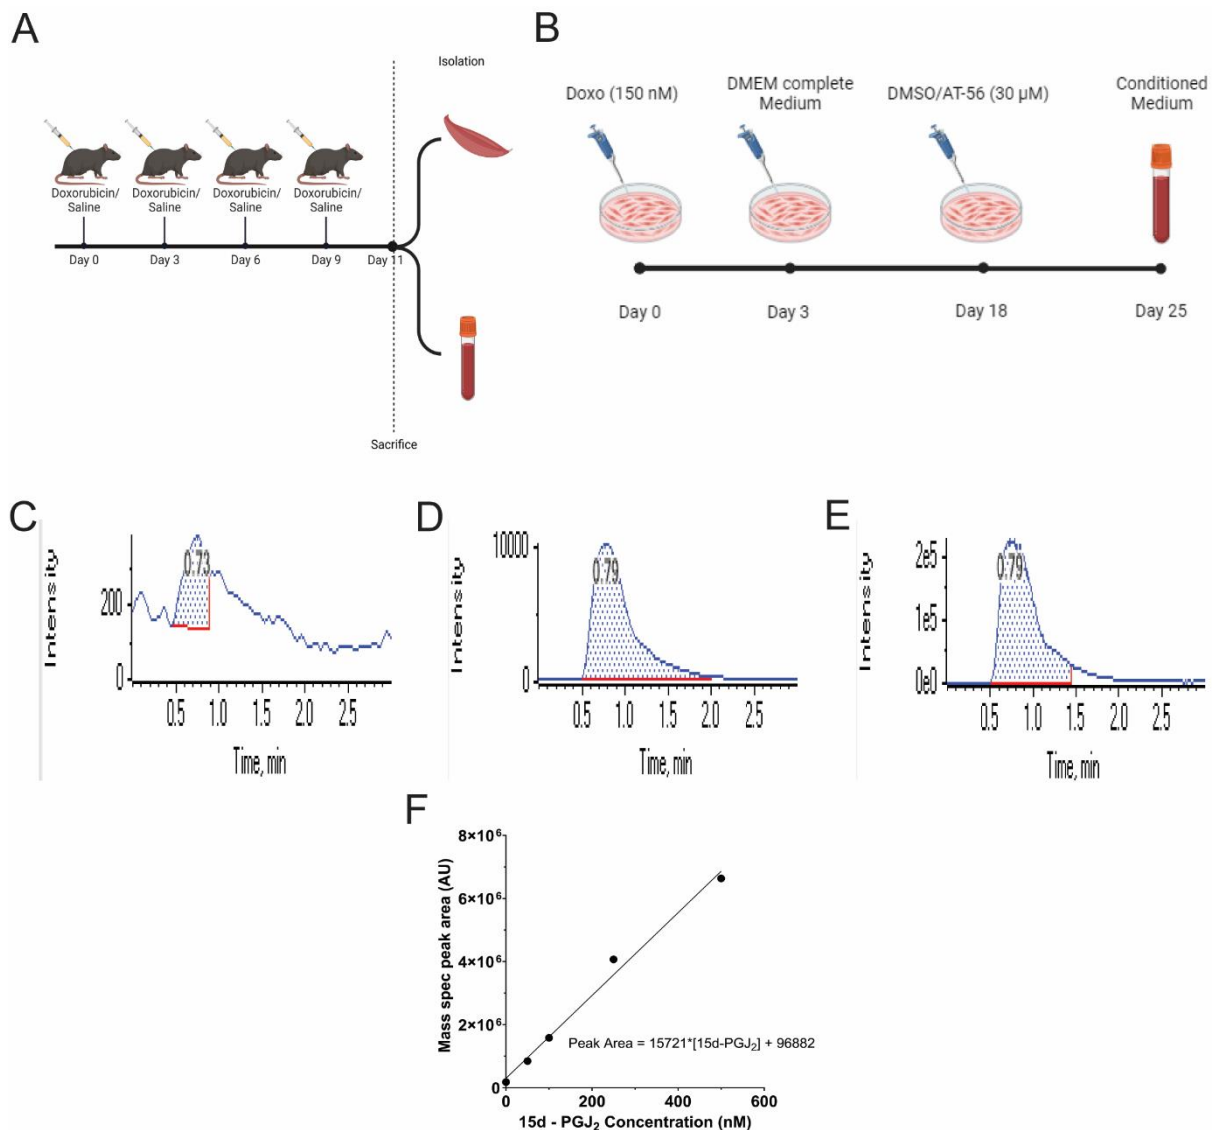

533

534 **Figure S1. Treatment with Doxo induces senescence *in vivo* and *in vitro* and**  
535 **induces release of eicosanoid prostaglandin 15d-PGJ<sub>2</sub>**

536 A. Schematic Representation of the experimental flow for treatment of B6J mice  
537 with Doxo (5 mg/kg) or Saline.

538 B. Schematic representation of the experimental flow for treatment of senescent  
539 C2C12 cells with prostaglandin D synthase (PTGDS) inhibitor AT-56 (30 μM) or  
540 DMSO.

541 C. Representative peak of quantification of m/z 315.100 → m/z 271 transitions  
542 from blank samples.



- 543 D. Representative peak of quantification of m/z 315.100 → m/z 271 transitions  
544 from conditioned medium of C2C12 myoblasts treated with DMSO.
- 545 E. Representative peak of quantification of m/z 315.100 → m/z 271 transitions  
546 from conditioned medium of C2C12 myoblasts treated with Doxo (150 nM).
- 547 F. Standard curve of m/z 315.100 → m/z 271 fragment peak areas vs  
548 concentrations of 15d-PGJ<sub>2</sub>

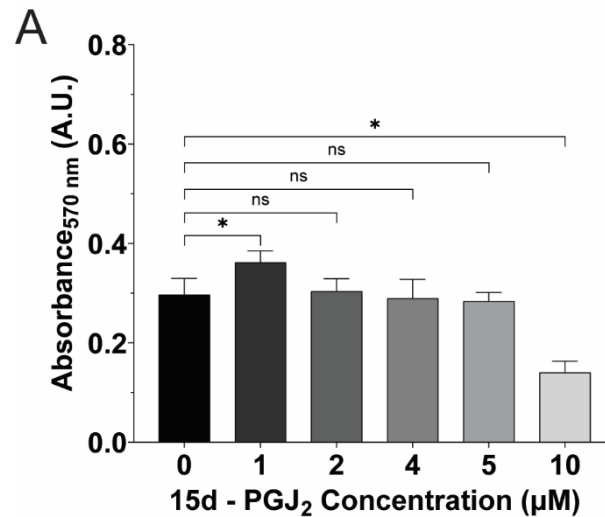

549

550 **Figure S2. Viability of C2C12 myoblasts after treatment with 15d-PGJ<sub>2</sub> (10 µM) in**  
551 **differentiating medium.**

552 A. Viability of C2C12 cells, measured by MTT assay, after 24 hours of treatment  
553 with 15-PGJ<sub>2</sub> (0 µM, 1 µM, 2 µM, 4 µM, 5 µM, 10 µM).

554 (Statistical significance was tested by the two-tailed student's t-test ns=p>0.05,  
555 \*=p<0.05, \*\*=p<0.01, \*\*\*=p<0.001, \*\*\*\*=p<0.0001)

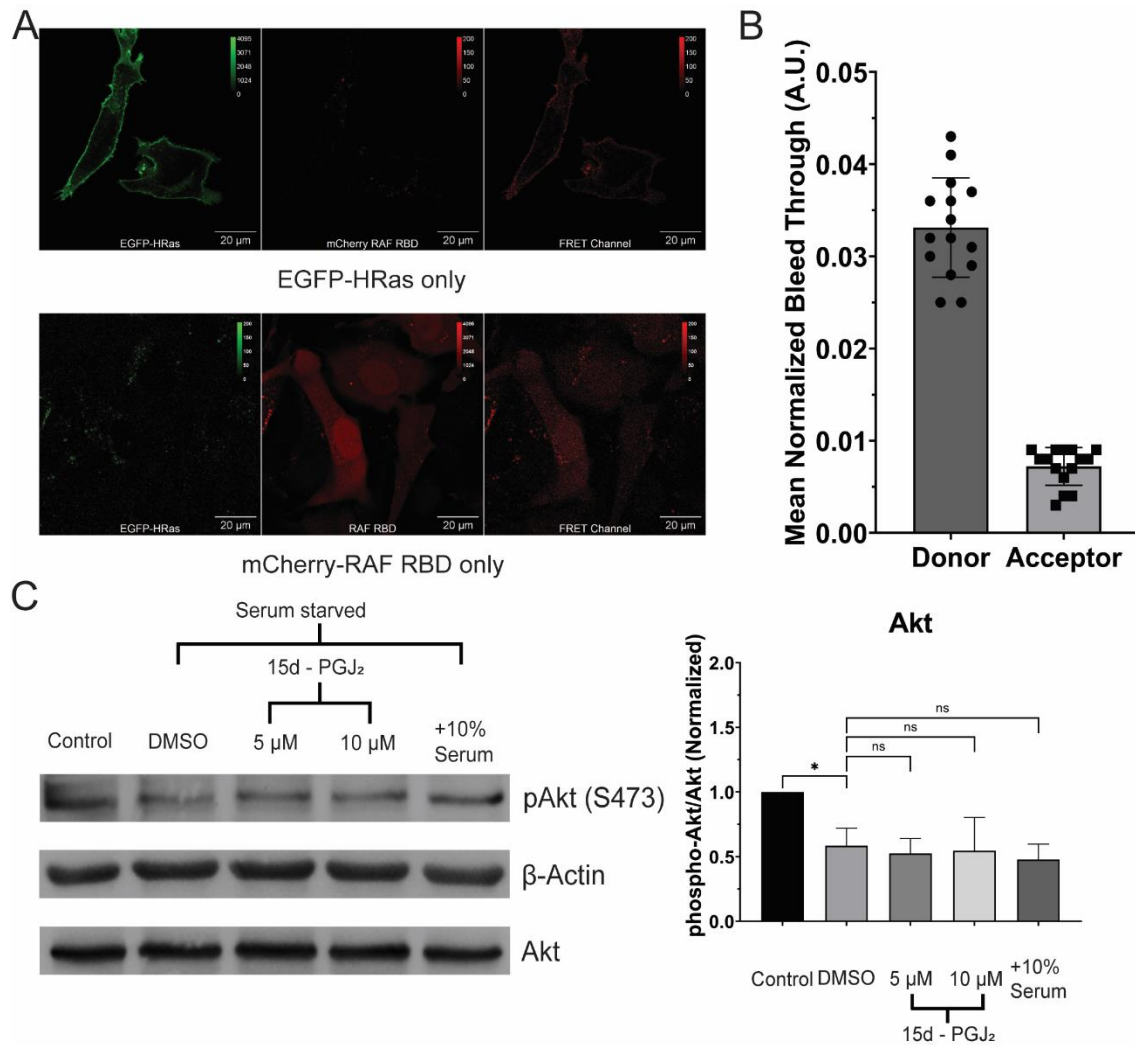

556

557 **Figure S3. Activation of HRas after treatment with 15d-PGJ<sub>2</sub>.**

558 A. Representative confocal micrograph of C2C12 cells expressing only EGFP-  
 559 tagged HRas or mCherry-tagged RAF RBD alone for spectral overlap (bleed-  
 560 through) calculations.

561 B. Mean bleed-through of EGFP-tagged HRas (Donor) and mCherry-tagged RAF  
 562 RBD (Acceptor) in the FRET channel.

563 C. Phosphorylation of Akt (measured by immunoblotting) in C2C12 cells treated  
 564 with 15d-PGJ<sub>2</sub> (5, 10 μM) or DMSO for 1 hr after starving the cells in 0.2%  
 565 serum medium for 24 hrs. The densitometric ratio of phosphorylated Akt  
 566 (Ser473) to total Akt was normalized to non-starved C2C12 cells. (Statistical  
 567 significance tested by two-tailed heteroscedastic student's t-test, N=3).

568 (Statistical significance was tested by the two-tailed student's t-test ns=p>0.05,

569 \*=p<0.05, \*\*=p<0.01, \*\*\*=p<0.001, \*\*\*\*=p<0.0001)

570

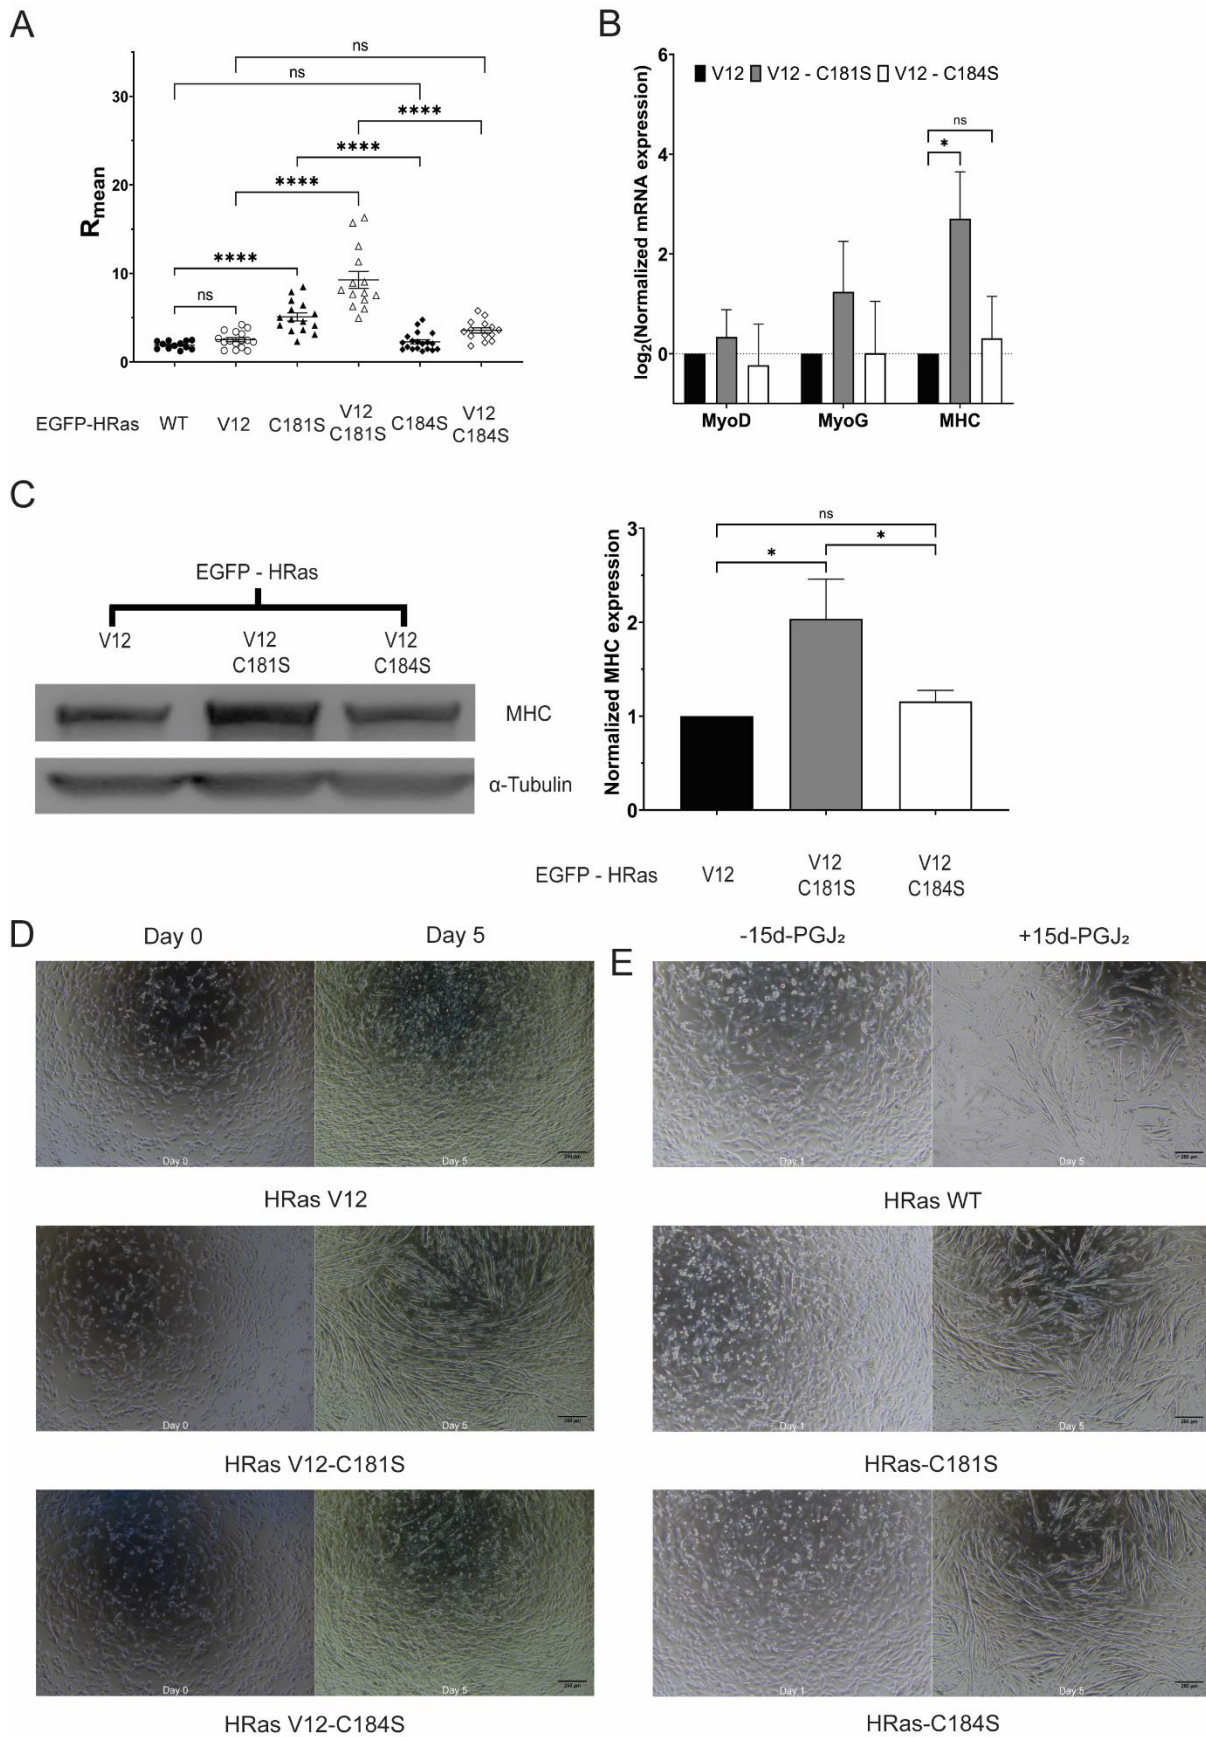

571

572 **Figure S4. C-terminal cysteine-mediated intracellular distribution of**  
573 **constitutively active HRas (HRas V12) regulates the differentiation of C2C12**  
574 **myoblasts.**

575 A. Distribution of EGFP-tagged HRas WT/ HRas V12/ HRas-C181S/ HRas V12-  
576 C181S/ HRas-C184S/ HRas V12-C184S between the Golgi complex and the  
577 plasma membrane, as seen by the scatter plot of  $R_{\text{mean}}$ , the ratio of the mean  
578 HRas intensity at the Golgi complex to that at the plasma membrane, in C2C12  
579 cells. (Statistical significance tested by two-tailed heteroscedastic student's t-  
580 test, N=3)

581 B. mRNA levels of MyoD, MyoG, and MyHC relative to 18s rRNA (measured by  
582 quantitative PCR) in C2C12 cells expressing EGFP-tagged HRas V12/ HRas  
583 V12-C181S/ HRas V12-C184S in C2C12 differentiation medium for 5 days.  
584 (Statistical significance tested by two-tailed heteroscedastic student's t-test,  
585 N=3)

586 C. Protein levels of MyHC (measured by immunoblotting) in C2C12 cells  
587 expressing EGFP-tagged HRas V12/HRas V12-C181S/HRas V12-C184S in  
588 C2C12 differentiation medium for 5 days. The densitometric ratio of levels of  
589 MyHC to  $\alpha$ -Tubulin was normalized to C2C12 cells expressing HRas V12.  
590 (Statistical significance tested by two-tailed heteroscedastic student's t-test,  
591 N=3).

592 D. Brightfield image of C2C12 cells expressing EGFP-HRas V12, V12 C181S, or  
593 V12 C184S on Day 0 and Day 5 of differentiation.

594 E. Brightfield image of C2C12 cells expressing EGFP-HRas WT, C181S, or C184S  
595 after 5 days of treatment with 15d-PGJ<sub>2</sub> or DMSO.

596 (Statistical significance was tested by the two-tailed student's t-test ns=p>0.05,  
597 \*=p<0.05, \*\*=p<0.01, \*\*\*=p<0.001, \*\*\*\*=p<0.0001)

598 **Supplementary Table 1: 15d-PGJ<sub>2</sub> conc. (pmol and fg/cell) detected in samples**  
599 **by mass spectrometry.**

| <b>Sample</b>                              | <b>15d-PGJ<sub>2</sub><br/>(pmol)</b> | <b>Cell<br/>Number</b> | <b>15d-PGJ<sub>2</sub>/Cell<br/>(fg)</b> |
|--------------------------------------------|---------------------------------------|------------------------|------------------------------------------|
| Conditioned medium Quiescent C2C12 cells_1 | 27.087                                | 462500                 | 18.531                                   |
| Conditioned medium Quiescent C2C12 cells_2 | 18.080                                | 650000                 | 8.801                                    |
| Conditioned medium Senescent C2C12 cells_1 | 809.633                               | 287500                 | 891.018                                  |
| Conditioned medium Senescent C2C12 cells_2 | 940.032                               | 300000                 | 991.420                                  |

600

601 **Supplementary Table 2: List of Primers:**

| <b>Primer Name</b>        | <b>Primer Sequence (5' – 3')</b>             |
|---------------------------|----------------------------------------------|
| HRas WT Fwd               | CCGCTCGAGCTATGACGGAATATAAGCTGG               |
| HRas WT Rev               | CCGGAATTCTCAGGAGAGCACACACTTGC                |
| HRas C181S Rev            | CCGGAATTCTCAGGAGAGCACACACTTGCAGCTCATGCTGCCGG |
| HRas C184S Rev            | CCGGAATTCTCAGGAGAGCACACACTTGTGCTCATG         |
| mm 18s qPCR Fwd           | CCCGTTGAACCCCATTCGTG                         |
| mm 18s qPCR Rev           | GGGCCTCACTAAACCATCCA                         |
| mm MyoD qPCR Fwd          | TCCGCTACATCGAAGGTCTG                         |
| mm MyoD qPCR Rev          | GTCCAGGTGCGTAGAAGGC                          |
| mm MyoG qPCR Fwd          | CGATCTCCGCTACAGAGGC                          |
| mm MyoG qPCR Rev          | GTTGGGACCGAACTCCAGT                          |
| mm MyHC qPCR Fwd          | TAAACGCAAGTGCCATTCTG                         |
| mm MyHC qPCR Rev          | GGGTCCGGGTAATAAGCTGG                         |
| mm PTGS1 qPCR Fwd         | TTACTATCCGTGCCAGAACCA                        |
| mm PTGS1 qPCR Rev         | CCCGTGCGAGTACAATCACA                         |
| mm PTGS2 qPCR Fwd         | TTCCAATCCATGTCAAACCGT                        |
| mm PTGS2 qPCR Rev         | AGTCCGGGTACAGTCACACTT                        |
| mm PTGDS qPCR Fwd         | GAGTACGCTCTGCTATTCAGC                        |
| mm PTGDS qPCR Rev         | GGTTGGGGCAGGAAAACAATG                        |
| mm p16 qPCR Fwd           | GCTCAACTACGGTGCAGATTC                        |
| mm p16 qPCR Rev           | GCACGATGTCTTGATGTCCC                         |
| mm p21 qPCR Fwd           | CCTGGTGATGTCCGACCTG                          |
| mm p21 qPCR Rev           | CCATGAGCGCATCGCAATC                          |
| mm p53 qPCR Fwd           | CCCCTGTCATCTTTTGTCCCT                        |
| mm p53 qPCR Rev           | AGCTGGCAGAATAGCTTATTGAG                      |
| mm CXCL1 qPCR Fwd         | ACTGCACCCAAACCGAAGTC                         |
| mm CXCL1 qPCR Rev         | TGGGGACACCTTTTAGCATCTT                       |
| mm CXCL2 qPCR Fwd         | CCAACCACCAGGCTACAGG                          |
| mm CXCL2 qPCR Rev         | GCGTCACACTCAAGCTCTG                          |
| mm TNF1 $\alpha$ qPCR Fwd | CCTGTAGCCCACGTCGTAG                          |
| mm TNF1 $\alpha$ qPCR Rev | GGGAGTAGACAAGGTACAACCC                       |

|                          |                          |
|--------------------------|--------------------------|
| mm IL6 qPCR Fwd          | CTGCAAGAGACTTCCATCCAG    |
| mm IL6 qPCR Rev          | AGTGGTATAGACAGGTCTGTTGG  |
| mm TGF1 $\beta$ qPCR Fwd | CTTCAATACGTCAGACATTTCGGG |
| mm TGF1 $\beta$ qPCR Rev | GTAACGCCAGGAATTGTTGCTA   |



603 **Supplementary Table 3: List of Reagents**

| <b>Item Description</b>                                               | <b>Manufacturer</b>      | <b>Catalog No.</b> |
|-----------------------------------------------------------------------|--------------------------|--------------------|
| pEGFP-C1                                                              | Clontech                 |                    |
| Phusion high fidelity DNA polymerase                                  | Thermo Scientific        | F 530              |
| Xho1 restriction enzyme                                               | New England Biolabs Inc. | R0146              |
| EcoR1 restriction enzyme                                              | New England Biolabs Inc. | R0101              |
| T4 DNA Ligase                                                         | Takara Bio               | 2011               |
| DMEM High Glucose                                                     | Gibco                    | 11995065           |
| FBS, Certified (Origin: United States)                                | Gibco                    | 16000044           |
| Horse Serum, Heat Inactivated (Origin: New Zealand)                   | Gibco                    | 26050070           |
| Penicillin – Streptomycin – Glutamine (100x)                          | Gibco                    | 10378016           |
| Penicillin – Streptomycin (100x)                                      | Gibco                    | 15140163           |
| DPBS, no calcium, no magnesium                                        | Gibco                    | 14190144           |
| 0.25% Trypsin - EDTA                                                  | Gibco                    | 25200056           |
| jetPRIME transfection reagent                                         | Polyplus                 | 101000046          |
| Doxorubicin                                                           | Sigma – Aldrich          | D1515              |
| 15-deoxy- $\Delta^{12,14}$ -Prostaglandin J <sub>2</sub>              | Cayman Chemical Company  | 18570              |
| 9,10-dihydro-15-deoxy- $\Delta^{12,14}$ -Prostaglandin J <sub>2</sub> | Cayman Chemical Company  | 18590              |
| 15-deoxy- $\Delta^{12,14}$ -Prostaglandin J <sub>2</sub> -Biotin      | Cayman Chemical Company  | 10141              |
| Dynabeads™ MyOne™ Streptavidin C1                                     | Invitrogen               | 65001              |
| cOmplete Protease inhibitor cocktail tablets                          | Roche                    | 11697498001        |
| Wheat germ agglutinin, Alexa fluor 633 conjugate                      | Invitrogen               | 2307289            |
| ProLong Gold Antifade Mounting medium                                 | Invitrogen               | P36930             |
| Paraformaldehyde                                                      | Sigma – Aldrich          | 158127             |
| TRizol reagent                                                        | Invitrogen               | 15596018           |
| PrimeScript™ 1st strand cDNA Synthesis Kit                            | Takara Bio               | 6110A              |
| PowerUp™ SYBR™ Green Master Mix                                       | Applied Biosystems       | A25742             |
| WesternBright™ ECL-spray Western blotting detection system            | advansta                 | K-12049-D50        |

|                                                      |                   |          |
|------------------------------------------------------|-------------------|----------|
| Fetuin (Bovine)                                      | Sigma – Aldrich   | F2379    |
| hEGF                                                 | Sigma – Aldrich   | E9644    |
| N2 Supplement                                        | Thermo Scientific | 17502048 |
| Dexamethasone                                        | Sigma – Aldrich   | D4902    |
| DMEM Low Glucose                                     | Thermo Scientific | 10567014 |
| Bovine Serum Albumin Fraction-V, Cell culture tested | HIMEDIA           | 9048468  |
| Pierce™ Streptavidin Magnetic Beads                  | Thermo Scientific | 88816    |

605 **Supplementary table 4: List of Antibodies**

| <b>Antibody Name</b>             | <b>Clonality</b> | <b>Species of Origin</b> | <b>Manufacturer</b>                               | <b>Catalog No.</b> |
|----------------------------------|------------------|--------------------------|---------------------------------------------------|--------------------|
| Phospho-Erk (Thr202/<br>Tyr204)  | Polyclonal       | Rabbit                   | Cell Signaling<br>Technology                      | 9101S              |
| Erk                              | Polyclonal       | Rabbit                   | Cell Signaling<br>Technology                      | 9102S              |
| GAPDH                            | Monoclonal       | Mouse                    | Puregene                                          | PG23002            |
| $\beta$ -actin                   | Polyclonal       | Rabbit                   | Cell Signaling<br>Technology                      | 4967S              |
| Phospho-Akt (Ser473)             | Monoclonal       | Mouse                    | Cell Signaling<br>Technology                      | 4051S              |
| Akt                              | Monoclonal       | Rabbit                   | Cell Signaling<br>Technology                      | 4691S              |
| GFP                              | Monoclonal       | Rabbit                   | Cell Signaling<br>Technology                      | 2956S              |
| Myosin Heavy Chain               | Monoclonal       | Mouse                    | Invitrogen                                        | 14-6503-82         |
| Myosin Heavy Chain               | Monoclonal       | Mouse                    | Developmental<br>Studies Hybridoma<br>Bank (DSHB) | MF20               |
| p21                              | Monoclonal       | Mouse                    | Santacruz<br>Biotechnology                        | sc-6246            |
| $\gamma$ H2A.X                   | Polyclonal       | Rabbit                   | Novus Biologicals                                 | NB100384           |
| Tubulin                          | Monoclonal       | Mouse                    | Cell Signaling<br>Technology                      | 3873S              |
| HRP - Anti-Mouse                 |                  | Horse                    | Cell Signaling<br>Technology                      | 7076S              |
| HRP - Anti-Rabbit                |                  | Goat                     | Cell Signaling<br>Technology                      | 7074P2             |
| Alexa Fluor 568 – Anti-<br>Mouse | Polyclonal       | Goat                     | Invitrogen                                        | A11031             |

## 607 **Materials and Methods**

### 608 **Plasmids**

609 Unmutated and cysteine mutants of HRas WT [HRas WT, HRas-C181S, and HRas-  
610 C184S] and HRas V12 [HRas V12, HRas V12-C181S, HRas V12-C184S] were cloned  
611 in the pEGFPC1 vector (Clontech) by restriction digestion-ligation method. Constructs  
612 of wild-type HRas were PCR amplified from a previously available HRas construct in  
613 the lab with construct-specific primers. Proper nucleotide additions were made to the  
614 forward primer to maintain the EGFP ORF, marking a 7 amino acid linker between the  
615 proteins. The construct sequences were confirmed by Sanger sequencing. GalT-  
616 TagRFP construct was a gift from Prof. Satyajit Mayor and was used to mark the Golgi.  
617 mCherry-RAF-RBD construct was a gift from Prof. Phillippe Bastiens and was used to  
618 measure the activity of HRas GTPase using FRET.

### 619 **Cell Maintenance**

620 C2C12 mouse myoblasts (CRL–1772) were obtained from ATCC and were maintained  
621 in DMEM complete medium @ 37° C, 5% CO<sub>2</sub>. For experiments, the cells were  
622 trypsinized with 0.125% trypsin-EDTA (Gibco) and were seeded in required numbers  
623 in cell culture dishes. Human Skeletal Muscle Myoblast (CC-2580) were obtained from  
624 Lonza and were maintained in DMEM Skeletal Muscle growth medium @ 37° C, 5%  
625 CO<sub>2</sub>. For experiments, the cells were trypsinized with 0.125% trypsin – EDTA (Gibco)  
626 and were seeded in required numbers in cell culture dishes. All cultures tested  
627 negative for mycoplasma checked by Mycoalert Mycoplasma Detection Kit (Lonza).

### 628 **Conditioned media collection**

629 C2C12 cells seeded in 60mm dishes were treated with Doxorubicin (150 nM) for 3  
630 days. The media was then changed to DMEM complete medium without Doxorubicin  
631 for 19 days after treatment with Doxorubicin. The cells were treated with DMSO or AT-  
632 56 (30 µM) in the DMEM complete medium for 2 days. On Day 21, the cells were  
633 treated with DMSO or At-56 in DMEM Starvation medium for 3 days. The media was  
634 then collected and centrifuged @1000g, R.T. for 5 minutes. The media was then stored  
635 at -80° C after flash freezing in liq. N<sub>2</sub> till further requirement.

### 636 **Treatments**

637 15d-PGJ<sub>2</sub> (Cayman Chemical Company) dissolved in DMSO (10 mM) was diluted in  
638 DMEM media for experiments. 9,10-dihydro-15d-PGJ<sub>2</sub> (Cayman Chemical Company)  
639 dissolved in DMSO (10 mM) was appropriately diluted in DMEM media for  
640 experiments. DMSO was used as vehicle control. A media change of the same  
641 composition was given every 24 hours. C2C12 cells with 70-80% confluency were  
642 treated with Doxorubicin (Doxo) for 3 days. After 72 hours, Doxo was removed from  
643 the medium and the cells were kept for 10 more days with media change every 3 days  
644 till the end of the experiment. C2C12 cells transfected with EGFP-HRas  
645 WT/C181S/C184S in 35mm dishes were treated with 15d-PGJ<sub>2</sub>-Biotin (5 μM) in  
646 DMEM Hi Glucose medium (Gibco) supplemented with 1% Penicillin-streptomycin-  
647 Glutamine (Gibco) without fetal bovine serum for 3 hours. Conditioned medium  
648 collected from senescent cells was thawed @ 37° C. The medium was then  
649 supplemented with 2% heat-inactivated horse serum and 1% penicillin-streptavidin-  
650 glutamine. C2C12 myoblasts were treated with the conditioned medium and were  
651 given a media change every 48 hours.

## 652 **Transfections:**

653 C2C12 cells were seeded in 35 mm dishes to achieve confluency of ~60-70%. For  
654 western blot, immunoprecipitation, and differentiation experiments, the cells were  
655 transfected with EGFP-tagged HRas WT/ HRas-C181S/ HRas-C184S/ HRas V12/  
656 HRas V12-C181S/ HRas V12-C184S using the jetPRIME transfection reagent  
657 (Polyplus) using the manufacturer's protocol. For measuring the intracellular  
658 distribution of HRas, the cells were reverse transfected with EGFP-tagged HRas WT/  
659 HRas-C181S/ HRas-C184S/ HRas V12/ HRas V12-C181S/ HRas V12-C184S and  
660 GalT-TagRFP, a Golgi apparatus marker protein tagged with red fluorescent TagRFP  
661 protein using the jetPRIME transfection reagent using the manufacturer's protocol. For  
662 measuring the activity of HRas, the cells seeded in imaging dishes (iBidi) were  
663 transfected with EGFP-HRas and mCherry-RAF-RBD using jetPRIME transfection  
664 reagent (Polyplus) using the manufacturer's protocol. Transfection efficiency was  
665 confirmed by checking for GFP and RFP fluorescence after 24 hours of transfection.

## 666 **Myoblast differentiation**

667 C2C12 cells were treated with either 15d-PGJ<sub>2</sub> or DMSO in the C2C12 differentiation  
668 medium. The cells were given a media change of the same composition every 24

669 hours. The cells were harvested after 5 days of 15d-PGJ<sub>2</sub> treatment for either RNA or  
670 protein isolation. Human Skeletal Muscle Myoblast cells were treated with DMSO or  
671 15d-PGJ<sub>2</sub> in the Skeletal Muscle Differentiation medium. A media change of the same  
672 composition was given every 24 hours. The cells were harvested after 5 days of  
673 treatment for protein isolation.

#### 674 **X-Gal staining**

675 Proliferative and Doxo-treated C2C12 cells were fixed with 0.25% glutaraldehyde,  
676 washed with PBS, and incubated overnight in X-gal staining solution at 37° C in a CO<sub>2</sub>-  
677 free chamber. The presence of the Indigo blue product was confirmed using the Ti2  
678 widefield inverted microscope (Nikon).

#### 679 **Immunoprecipitation**

680 C2C12 cells transfected with EGFP-HRas and treated with 15d-PGJ<sub>2</sub>-Biotin were  
681 harvested and lysed in RIPA-PP buffer and the lysate was centrifuged @15000 rpm,  
682 4° C, 30 minutes. Protein estimation was done using the BCA assay kit (G  
683 Biosciences). 100 µg of protein was loaded on 10 µl MyOne Streptavidin C1  
684 dynabeads blocked with 1% BSA in IP washing buffer. The lysate-streptavidin mix was  
685 incubated @4° C, 10 rpm overnight. The beads were then washed with IP washing  
686 buffer and then boiled in 20 µl Laemmli buffer. 15 µl of the beads were loaded on 12%  
687 SDS-Polyacrylamide gel for detection of EGFP-HRas by immunoblotting using EGFP  
688 antibody.

#### 689 **Western blotting**

690 For measuring Erk/Akt phosphorylation in C2C12 cells were seeded in 35 mm dishes.  
691 1x 35 mm dish was harvested in RIPA – PP the next day, while the rest were incubated  
692 in DMEM starvation medium @37° C. The cells were treated with 15d - PGJ<sub>2</sub> after 24  
693 hrs of starvation @37° C. The cells were harvested at 1 hour after treatment in RIPA-  
694 PP. Protein quantification was done using BCA assay (G Biosciences) using the  
695 manufacturer's protocol. An equal mass of proteins was loaded onto a 12% SDS  
696 Polyacrylamide gel in Laemmli buffer. The proteins were transferred onto a PVDF  
697 membrane and were probed with phospho-Erk/Erk antibodies for measuring Erk  
698 phosphorylation and with phospho-Akt/Akt antibodies for measuring Akt  
699 phosphorylation. For measuring the expression of Myosin heavy chain, C2C12 cells

700 expressing EGFP-tagged HRas WT/ HRas-C181S/ HRas-C184S/ HRas V12/ HRas  
701 V12-C181S/ HRas V12-C184S or Human Skeletal Muscle Myoblasts were seeded in  
702 35 mm dishes and were harvested in RIPA-PP after 5 days of differentiation. Protein  
703 quantification was done using BCA assay (G Biosciences) using the manufacturer's  
704 protocol. An equal mass of proteins was loaded onto an 8% SDS Polyacrylamide gel  
705 in Laemmli buffer. The proteins were transferred onto a PVDF membrane and were  
706 probed with Myosin Heavy Chain Antibody.

### 707 **qPCR**

708 C2C12 cells, untransfected or expressing EGFP-tagged HRas WT/ HRas-C181S/  
709 HRas-C184S and treated with DMSO/15d - PGJ<sub>2</sub>, or expressing EGFP-tagged HRas  
710 V12/ HRas V12-C181S/ HRas V12-C184S were lysed in TRIZol at the end of the  
711 experiment (Invitrogen). RNA was isolated from the lysate by the chloroform-  
712 isopropanol method using the manufacturer's protocol. The RNA was quantified and  
713 1.5 µg of RNA was used to prepare cDNA using PrimeScript 1st strand cDNA  
714 Synthesis Kit (Takara Bio) and random hexamer primer. Gene expression for  
715 differentiation markers was measured by qPCR using PowerUp™ SYBR™ Green  
716 Master Mix (Applied Biosystems) and previously reported qPCR primers (Wang et al.,  
717 2012). Relative gene expression was quantified using the  $\Delta\Delta C_T$  method (Livak and  
718 Schmittgen 2001) with 18s rRNA as an internal loading control and DMSO vehicle as  
719 an experimental control.

### 720 **Immunofluorescence**

721 C2C12 cells were seeded in 35 mm dishes (Corning) on glass coverslips (Blue Star)  
722 coated with 0.2% Gelatin (Porcine, Sigma Aldrich) and were fixed with the fixative  
723 solution at the end of the experiment. The cells were then permeabilized and blocked  
724 with the blocking solution and were then incubated with Myosin Heavy Chain antibody  
725 in the blocking solution overnight. The cells were then washed with 1x PBS, incubated  
726 with fluorophore tagged secondary antibody, and were mounted in Prolong gold  
727 antifade medium with DAPI (Invitrogen). The cells were then imaged under the  
728 FV3000 inverted confocal laser scanning microscope (Olympus-Evident) using  
729 appropriate lasers and detectors.

### 730 **Confocal microscopy for measuring HRas distribution between the Golgi and** 731 **the plasma membrane**

732 C2C12 cells expressing EGFP-tagged HRas WT/ HRas-C181S/ HRas-C184S + GalT-  
733 TagRFP were starved overnight in DMEM starvation medium and treated with DMSO  
734 or 15d-PGJ<sub>2</sub> (10 μM) in DMEM complete medium for 24 hrs, with a medium change  
735 @ 12 hrs post-treatment. The cells were then fixed with the fixative solution @ R. T.,  
736 washed with PBS, and stained for plasma membrane with Alexa Fluor 633 conjugated  
737 Wheat Germ Agglutinin (WGA-633) (Invitrogen). The cells were washed with PBS and  
738 were then mounted on glass slides in ProLong Gold Antifade Mounting medium  
739 (Invitrogen). C2C12 cells expressing EGFP-tagged HRas V12/ HRas V12-C181S/  
740 HRas V12-C184S were also fixed with the fixative solution @R. T., washed with PBS,  
741 stained with WGA-633, and mounted on slides in Prolong gold antifade medium  
742 (Invitrogen). The cells were imaged with the FV3000 inverted confocal laser scanning  
743 microscope (Olympus-Evident) using appropriate lasers and detectors. Preliminary  
744 image processing was done using ImageJ (NIH), while batch analysis of HRas at the  
745 plasma membrane and the Golgi complex was done using a custom MATLAB script,  
746 where EGFP-HRas image was overlaid onto the GalT-TagRFP and WGA-633 image  
747 to obtain HRas localization at the Golgi complex and the Plasma Membrane  
748 respectively. A ratio of mean HRas intensity at the Golgi complex to that of at the  
749 Plasma membrane ( $R_{\text{mean}}$ ) was calculated and was used to compare HRas distribution  
750 between treatments.

### 751 **FRET confocal microscopy to measure the intracellular activity of HRas**

752 C2C12 cells expressing EGFP-tagged HRas WT/HRas C181S/HRas C184S and  
753 mCherry-RAF-RBD were starved overnight in the DMEM starvation medium. The cells  
754 were imaged with the FV3000 inverted confocal laser scanning microscope (Olympus-  
755 Evident) using the following lasers and detectors:

- 756 1. Donor Channel: 488nm excitation, 510 (+/-) 20nm detection.
- 757 2. Acceptor Channel: 561nm excitation, 630 (+/-) 50nm detection.
- 758 3. FRET Channel: 488nm excitation, 630 (+/-) 50nm detection.

759 The cells were then treated with 15d-PGJ<sub>2</sub> (10 μM) for 1 hour and were imaged using  
760 the same imaging parameters. C2C12 cells expressing EGFP-HRas or mCherry-RAF  
761 RBD only were used to calculate the bleed-through corrections (EGFP emission @  
762 630 (+/-) 50nm, and Excitation of mCherry by 488 nm laser). Preliminary processing  
763 was done using ImageJ (NIH). The FRET index was calculated using the FRET and



764 co-localization analyzer plugin(Hachet-Haas et al., 2006). The FRET index was then  
765 divided by the intensity of the Acceptor channel to normalize the variation in the  
766 expression of mCherry. We used the mean normalized FRET index to compare the  
767 activity of HRas before and after treatment with 15d-PGJ<sub>2</sub>.

### 768 **Quantification of myotube fusion index**

769 Differentiated C2C12 myoblasts were immunostained for MHC and DAPI and were  
770 imaged on the FV3000 inverted confocal laser scanning microscope (Olympus-  
771 Evident). Analysis of the fusion index was done using the Myotube Analyzer  
772 Software(Noë et al., 2022). DAPI and MHC images were thresholded to remove  
773 background noise. The images were converted to binary masks and the channels were  
774 overlaid to obtain the no. of nuclei overlaying with MHC<sup>+ve</sup> fibers. The fusion index  
775 was calculated as the percentage ratio of no. nuclei overlaying the MHC<sup>+ve</sup> fibers to  
776 the total no. of nuclei in the field of view.

### 777 **Quantification of cell doubling time**

778 Cells were counted every 24 hours and the normalization was done to the number of  
779 cells counted on day 0 of the treatment (to consider attaching efficiency and other cell  
780 culture parameters). Doubling time was calculated as the reciprocal of the slope of the  
781 graph of log<sub>2</sub>(normalized cell number) vs time.

### 782 **MTT Assay**

783 An equal number of C2C12 cells were seeded in 96 well plates in replicates. MTT  
784 assay was done at the end of the experiment using the manufacturer's protocol. MTT  
785 reagent (Sigma Aldrich) was dissolved in 1x DPBS (5 mg/ml) and was filter sterilized.  
786 MTT reagent was added to each well and the cells were incubated @37° C, 5% CO<sub>2</sub>  
787 for 3 hours. The medium was removed at the end of the incubation and the precipitated  
788 crystals were dissolved in DMSO @37° C, 5% CO<sub>2</sub> for 15 minutes. Absorbance @570  
789 nm was recorded using the varioskans multimode plate reader (Thermo Scientific).

### 790 **Animal Experiments**

791 Mice were maintained at BLiSC Animal Care and Resource Centre (ACRC). All the  
792 procedures performed were approved by the Internal Animal Users Committee (IAUC)  
793 and the Institutional Animal Ethics Committee (IAEC). 12–15-week-old C57BL/6J

794 (JAX#000664) mice were injected intraperitoneally (I.P.) with 5 mg/kg Doxorubicin  
795 (Doxo) four times, once every three days. Intraperitoneal injection of Saline was used  
796 as a control. The mice were sacrificed on Day 11 after the first injection. Hindlimb  
797 muscles from 4 animals (control and treated with Doxo each) were used for qPCR  
798 analysis and Hindlimb muscles from 3 animals (control and treated with Doxo each)  
799 were used for immunohistochemical analysis.

## 800 **Lipid extraction and detection of 15d-PGJ<sub>2</sub> by mass spectrometry**

801 For lipid extraction, cell pellets were resuspended in 3ml of a methanol solvent [water:  
802 methanol: 2:1, 1% formic acid (FA)] whereas only 1 ml of methanol with 3% FA was  
803 added to the 2 ml of CM, making a uniform sample volume of 3 ml. Subsequently, 1  
804 ml of ethyl acetate was added to each sample and mixed vigorously. Phase separation  
805 was done by centrifuging the mixture (12000xg, 4°C for 10 mins), and the organic  
806 phase containing the lipid was collected. This process was repeated thrice in total and  
807 all the organic phases were combined and dried under a nitrogen stream at RT. The  
808 residues were resuspended in 100 µl of 50% acetonitrile in water with 0.1% FA and  
809 were subjected to mass spec analysis using the Waters® Acquity UPLC class I system  
810 The detection of 15d-PGJ<sub>2</sub> was performed using an electrospray ionization source  
811 (ESI) operating in the negative ion mode and a quadrupole trap mass spectrometer  
812 (AB SCIEX QTRAP 6500) connected to a Waters® Acquity UPLC class I system  
813 (Waters, Germany) outfitted with a binary solvent delivery system with an online  
814 degasser and a column manager with a column oven coupled to a UPLC autosampler.  
815 5 µl samples were injected into the union for analysis. Solvent A consisted of 0.1%  
816 ammonium acetate in water and solvent B was 0.1% ammonium acetate in a mixture  
817 of acetonitrile/water (95:5). For each run, the LC gradient was: 0 min, 20% B; 0.5 min,  
818 20% B; 1.5 min, 90% B; 2.5 min, 20% B; 3min, 20% B. Analyte detection was  
819 performed using multiple reaction monitoring (MRM), 315.100 → 271.100 and 315.100  
820 → 203.100. Source parameters were set as follows: capillary voltage 3.8 kV,  
821 desolvation gas flow 25 L/h, source temperature 350 °C, ion source gas 1 flow 40 L/h,  
822 and ion source gas 2 flow 40 L/h. Acquisition and quantification were completed with  
823 Analyst 1.6.3 and Multiquant 3.0.3, respectively (method adopted from (Morgenstern  
824 et al., 2018)). For the standards, 2ml media of different known concentrations (50nM,  
825 100nM, 250nM, and 500nM) of 15d-PGJ<sub>2</sub> were prepared and subjected to the same

826 extraction procedure as that of CM. A standard curve was plotted with the known  
827 concentration and the mass spec peak area, and the concentration of the lipid in  
828 samples was calculated.

## 829 Reagents

- 830 • DMEM complete medium: DMEM Hi Glucose medium (Gibco) supplemented  
831 with 1% Penicillin – Streptomycin – Glutamine (Gibco) and heat-inactivated  
832 10% Fetal Bovine Serum (US origin) (Gibco).
- 833 • Basal Conditioned medium: DMEM Hi Glucose medium (Gibco) supplemented  
834 with 1% Penicillin – Streptomycin – Glutamine (Gibco) and heat-inactivated 2%  
835 Fetal Bovine Serum (US origin) (Gibco).
- 836 • C2C12 differentiation medium: DMEM Hi Glucose medium (Gibco)  
837 supplemented with 2% Horse Serum (Gibco) and 1% Penicillin – Streptomycin  
838 – Glutamine (Gibco).
- 839 • DMEM Starvation medium: DMEM Hi Glucose medium (Gibco) supplemented  
840 with 0.2% heat-inactivated fetal bovine serum (US origin) (Gibco) and 1%  
841 Penicillin – Streptomycin – Glutamine (Gibco).
- 842 • RIPA – PP buffer: RIPA buffer (Invitrogen) supplemented with protease inhibitor  
843 cocktail (Roche) and 5 mM Sodium Fluoride and 5 mM Sodium Orthovanadate.
- 844 • TBS – T buffer: 50 mM Tris-Cl (pH = 7.5), 150 mM NaCl and 0.1% Tween – 20  
845 in water.
- 846 • PBS: 2.67 mM KCl, 1.47 mM KH<sub>2</sub>PO<sub>4</sub>, 137.93 mM NaCl, 8.06 mM Na<sub>2</sub>HPO<sub>4</sub> in  
847 water.
- 848 • IP Washing Buffer: 150 mM NaCl, 0.1% SDS, 1% NP-40 in 50 mM Tris-Cl  
849 (pH=7)
- 850 • Fixative Solution: 4% (w/v) Paraformaldehyde (Sigma – Aldrich) in PBS.
- 851 • Blocking Solution: 2% Heat Inactivated FBS, 0.2% BSA, 0.2% Triton - X, 0.05%  
852 NaN<sub>3</sub> in PBS.
- 853 • Skeletal Muscle Growth Medium: DMEM Low Glucose Medium (Gibco),  
854 supplemented with 1% Penicillin – Streptomycin – Glutamine (Gibco), heat-  
855 inactivated 10% Fetal Bovine Serum (US origin) (Gibco), Bovine Fetuin (50  
856 µg/ml) (Sigma – Aldrich), Dexamethasone (0.4 µg/ml), and hEGF (10 ng/ml).
- 857 • Skeletal Muscle Differentiation Medium: DMEM low glucose medium (Gibco)  
858 supplemented with 2% Horse Serum, 1% Penicillin – Streptomycin (Gibco), and  
859 1% N2 Supplement.

## 860 **Acknowledgments**

861 We thank Prof. Satyajit Mayor (NCBS), Prof. Phillipe Bastiens, and Prof. Apurva Sarin  
862 (InStem) for providing the wild-type HRas construct, the mCherry-RAF RBD construct  
863 and the vector backbones respectively. We thank Dr. Neetu Saini (InStem) for her help  
864 with setting up the cell culture facility. We thank Mr. Heera Lal for his help with the  
865 animal work. We thank Dr. Kamlesh Kumar Yadav and Ms. Sudeshna Saha for their  
866 help during the project. We thank the Central Imaging and Flow Cytometry Facility  
867 (CIFF) (NCBS-InStem) for their support with microscopy. We thank the Animal Care  
868 and Resource Centre (ACRC) (NCBS-InStem) for their support with mouse  
869 experiments. We thank the Mass Spectrometry facility (NCBS-InStem) for their  
870 support with the mass spectrometry work.

## 871 **Funding**

872 This work was supported by SERB SUPRA grant to Dr. Arvind Ramanathan. SSP and  
873 AB are supported by GS program (InStem), AV is supported by DBT-JRF grant.

## 874 **Author Contribution**

875 SSP: Project conceptualization, Cell culture treatments and assays, Biochemistry,  
876 Microscopy, Image Processing, and analysis, Writing: original draft, review, and edits.

877 AB: Animal work, Cell culture treatments and assays, Biochemistry, Mass  
878 Spectrometry, Writing: review and edits.

879 AV: Cell culture treatments and assays, Image processing and analysis, writing: review  
880 and edits.

881 SSS: Cell culture treatments and assays, Biochemistry, Writing: review and edits.

882 MAJ: Image processing and analysis.

883 RGHM: Mass Spectrometry.

884 AR: Project Conceptualization, Writing: original draft, review, and edits. Corresponding  
885 Author.

## 886 **Competing Interests**

887 The authors declare no competing interests.

## 888 **References**

- 889 Agudo-Ibáñez L, Herrero A, Barbacid M, Crespo P. 2015. H-Ras Distribution and  
890 Signaling in Plasma Membrane Microdomains Are Regulated by Acylation and  
891 Deacylation Events. *Mol Cell Biol* **35**:1898–1914. doi:10.1128/mcb.01398-14
- 892 Bennett AM, Tonks NK. 1997. Regulation of distinct stages of skeletal muscle  
893 differentiation by mitogen-activated protein kinases. *Science (80- )* **278**:1288–  
894 1291. doi:10.1126/SCIENCE.278.5341.1288
- 895 Bihani T, Chicas A, Lo CPK, Lin AW. 2007. Dissecting the senescence-like program  
896 in tumor cells activated by ras signaling. *J Biol Chem* **282**:2666–2675.  
897 doi:10.1074/jbc.M608127200
- 898 Bihani T, Mason DX, Jackson TJ, Chen SC, Boettner B, Lin AW. 2004. Differential  
899 Oncogenic Ras Signaling and Senescence in Tumor Cells. *Cell Cycle* **3**:1201–  
900 1207.
- 901 Bittles AH, Harper N. 1984. Increased glycolysis in ageing cultured human diploid  
902 fibroblasts. *Biosci Rep* **4**:751–756. doi:10.1007/BF01128816
- 903 Busquets-Hernández C, Triola G. 2021. Palmitoylation as a Key Regulator of Ras  
904 Localization and Function. *Front Mol Biosci* **8**:1–8.  
905 doi:10.3389/fmolb.2021.659861
- 906 Calabrese V, Mallette FA, Deschênes-Simard X, Ramanathan S, Gagnon J, Moores  
907 A, Ilangumaran S, Ferbeyre G. 2009. SOCS1 Links Cytokine Signaling to p53 and  
908 Senescence. *Mol Cell* **36**:754–767. doi:10.1016/j.molcel.2009.09.044
- 909 Campisi J. 2005. Senescent cells, tumor suppression, and organismal aging: Good  
910 citizens, bad neighbors. *Cell* **120**:513–522. doi:10.1016/j.cell.2005.02.003
- 911 Casar B, Badrock AP, Jiménez I, Arozarena I, Colón-bolea P, Lorenzo-martín LF,  
912 Barinaga-rementería I, Barriuso J, Cappitelli V, Donoghue DJ, Bustelo XR,  
913 Hurlstone A, Crespo P. 2018. RAS at the Golgi antagonizes malignant  
914 transformation through PTPR  $\kappa$  -mediated inhibition of ERK activation. *Nat*  
915 *Commun* 1–17. doi:10.1038/s41467-018-05941-8
- 916 Chen Q, Ames BN. 1994. Senescence-like growth arrest induced by hydrogen  
917 peroxide in human diploid fibroblast F65 cells. *Proc Natl Acad Sci U S A* **91**:4130–

- 918 4134. doi:10.1073/pnas.91.10.4130
- 919 Chen QM, Bartholomew JC, Campisi J, Acosta M, Reagan JD, Ames BN. 1998.  
920 Molecular analysis of H<sub>2</sub>O<sub>2</sub>-induced senescent-like growth arrest in normal  
921 human fibroblasts: p53 and Rb control G1 arrest but not cell replication. *Biochem*  
922 *J* **332**:43–50. doi:10.1042/bj3320043
- 923 Chen YX, Zhong XY, Qin YF, Bing W, He LZ. 2003. 15d-PGJ2 inhibits cell growth and  
924 induces apoptosis of MCG-803 human gastric cancer cell line. *World J*  
925 *Gastroenterol* **9**:2149. doi:10.3748/WJG.V9.I10.2149
- 926 Childs BG, Durik M, Baker DJ, van Deursen JM. 2015. Cellular senescence in aging  
927 and age-related disease: from mechanisms to therapy disease: from mechanisms  
928 to therapy. doi:10.1038/nm.4000
- 929 Choi J, Suh J-Y, Kim D-H, Na H-K, Surh Y-J. 2020. 15-Deoxy- $\Delta$ 12,14-prostaglandin  
930 J2 Induces Epithelial-to-mesenchymal Transition in Human Breast Cancer Cells  
931 and Promotes Fibroblast Activation. *J Cancer Prev* **25**:152–163.  
932 doi:10.15430/JCP.2020.25.3.152
- 933 Conte TC, Duran-Bishop G, Orfi Z, Mokhtari I, Deprez A, Côté I, Molina T, Kim TY,  
934 Tellier L, Roussel MP, Maggiorani D, Benabdallah B, Leclerc S, Feulner L,  
935 Pellerito O, Mathieu J, Andelfinger G, Gagnon C, Beauséjour C, McGraw S,  
936 Duchesne E, Dumont NA. 2023. Clearance of defective muscle stem cells by  
937 senolytics restores myogenesis in myotonic dystrophy type 1. *Nat Commun* **2023**  
938 *14*:1–17. doi:10.1038/s41467-023-39663-3
- 939 Coppé JP, Desprez PY, Krtolica A, Campisi J. 2010. The senescence-associated  
940 secretory phenotype: The dark side of tumor suppression. *Annu Rev Pathol Mech*  
941 *Dis* **5**:99–118. doi:10.1146/annurev-pathol-121808-102144
- 942 Coppé JP, Patil CK, Rodier F, Sun Y, Muñoz DP, Goldstein J, Nelson PS, Desprez  
943 PY, Campisi J. 2008. Senescence-associated secretory phenotypes reveal cell-  
944 nonautonomous functions of oncogenic RAS and the p53 tumor suppressor.  
945 *PLoS Biol* **6**. doi:10.1371/journal.pbio.0060301
- 946 Cosgrove BD, Gilbert PM, Porpiglia E, Mourkioti F, Lee SP, Corbel SY, Llewellyn ME,  
947 Delp SL, Blau HM. 2014. Rejuvenation of the muscle stem cell population restores

948 strength to injured aged muscles. *Nat Med* 2014 203 **20**:255–264.  
949 doi:10.1038/nm.3464

950 D'Adda Di Fagagna F. 2008. Living on a break: Cellular senescence as a DNA-  
951 damage response. *Nat Rev Cancer* **8**:512–522. doi:10.1038/nrc2440

952 D'Adda Di Fagagna F, Reaper PM, Clay-Farrace L, Fiegler H, Carr P, Von Zglinicki T,  
953 Saretzki G, Carter NP, Jackson SP. 2003. A DNA damage checkpoint response  
954 in telomere-initiated senescence. *Nature* **426**:194–198. doi:10.1038/nature02118

955 Davalos AR, Coppe JP, Campisi J, Desprez PY. 2010. Senescent cells as a source of  
956 inflammatory factors for tumor progression. *Cancer Metastasis Rev* **29**:273–283.  
957 doi:10.1007/s10555-010-9220-9

958 Davis M, Malcolm S, Hall A, Marshall CJ. 1983. Localisation of the human N-ras  
959 oncogene to chromosome 1cen - p21 by in situ hybridisation. *EMBO J* **2**:2281–  
960 2283. doi:10.1002/J.1460-2075.1983.TB01735.X

961 de Lima Junior EA, Yamashita AS, Pimentel GD, De Sousa LGO, Santos RVT,  
962 Gonçalves CL, Streck EL, de Lira FS, Rosa Neto JC. 2016. Doxorubicin caused  
963 severe hyperglycaemia and insulin resistance, mediated by inhibition in AMPk  
964 signalling in skeletal muscle. *J Cachexia Sarcopenia Muscle* **7**:615–625.  
965 doi:10.1002/JCSM.12104

966 Di Leonardo A, Linke SP, Clarkin K, Wahl GM. 1994. DNA damage triggers a  
967 prolonged p53-dependent G1 arrest and long-term induction of Cip1 in normal  
968 human fibroblasts. *Genes Dev* **8**:2540–2551. doi:10.1101/gad.8.21.2540

969 Dilley TK, Bowden GT, Chen QM. 2003. Novel mechanisms of sublethal oxidant  
970 toxicity: Induction of premature senescence in human fibroblasts confers tumor  
971 promoter activity. *Exp Cell Res* **290**:38–48. doi:10.1016/S0014-4827(03)00308-2

972 Dimri GP, Leet X, Basile G, Acosta M, Scortt G, Roskelley C, Medrano EE, Linskens  
973 M, Rubeljii I, Pereira-Smithii O, Peacocket M, Campisi J, Pardee B. 1995. A  
974 biomarker that identifies senescent human cells in culture and in aging skin in vivo  
975 (replicative senescence/tumor suppression/18-galactosidase) Communicated by  
976 Arthur. *Cell Biology* **92**:9363–9367.

977 Engler M, Fidan M, Nandi S, Cirstea IC. 2021. Senescence in RASopathies, a possible



- 978 novel contributor to a complex pathophenotype. *Mech Ageing Dev.*  
979 doi:10.1016/j.mad.2020.111411
- 980 Francis TG, Jaka O, Ellison-Hughes GM, Lazarus NR, Harridge SDR. 2022. Human  
981 primary skeletal muscle-derived myoblasts and fibroblasts reveal different  
982 senescent phenotypes. *JCSM Rapid Commun* **5**:226–238. doi:10.1002/RCO2.67
- 983 Franza BR, Maruyama K, Garrels JI, Ruley HE. 1986. In vitro establishment is not a  
984 sufficient prerequisite for transformation by activated ras oncogenes. *Cell* **44**:409–  
985 418. doi:10.1016/0092-8674(86)90462-9
- 986 Gilliam LAA, Moylan JS, Patterson EW, Smith JD, Wilson AS, Rabbani Z, Reid MB.  
987 2012. Doxorubicin acts via mitochondrial ROS to stimulate catabolism in C2C12  
988 myotubes. *Am J Physiol - Cell Physiol* **302**:195–202.  
989 doi:10.1152/AJPCELL.00217.2011/ASSET/IMAGES/LARGE/ZH001211679900  
990 08.JPEG
- 991 Gilliam LAA, St. Clair DK. 2011. Chemotherapy-Induced Weakness and Fatigue in  
992 Skeletal Muscle: The Role of Oxidative Stress. <https://home.liebertpub.com/ars>  
993 **15**:2543–2563. doi:10.1089/ARS.2011.3965
- 994 Gutierrez L, Magee AI, Marshall CJ, Hancock JF. 1989. Post-translational processing  
995 of p21ras is two-step and involves carboxyl-methylation and carboxy-terminal  
996 proteolysis. *EMBO J* **8**:1093–1098. doi:10.1002/J.1460-2075.1989.TB03478.X
- 997 Hachet-Haas M, Converset N, Marchal O, Matthes H, Gioria S, Galzi J-L, Lecat S.  
998 2006. FRET and colocalization analyzer—A method to validate measurements of  
999 sensitized emission FRET acquired by confocal microscopy and available as an  
1000 ImageJ Plug-in. *Microsc Res Tech* **69**:941–956. doi:10.1002/jemt.20376
- 1001 Hamsanathan S, Gurkar AU. 2022. Lipids as Regulators of Cellular Senescence. *Front*  
1002 *Physiol* **13**:796850. doi:10.3389/FPHYS.2022.796850/BIBTEX
- 1003 Harvey JJ. 1964. An Unidentified Virus which causes the Rapid Production of Tumours  
1004 in Mice. *Nat* 1964 2044963 204:1104–1105. doi:10.1038/2041104b0
- 1005 Hayflick L. 1965. The limited in vitro lifetime of human diploid cell strains. *Exp Cell Res*  
1006 **37**:614–636. doi:10.1016/0014-4827(65)90211-9
- 1007 Hiensch AE, Bolam KA, Mijwel S, Jeneson JAL, Huitema ADR, Kranenburg O, van

- 1008 der Wall E, Rundqvist H, Wengstrom Y, May AM. 2020. Doxorubicin-induced  
1009 skeletal muscle atrophy: Elucidating the underlying molecular pathways. *Acta*  
1010 *Physiol* **229**:e13400. doi:10.1111/APHA.13400
- 1011 Hu S., Liu B, Shang J, Lu T, Cai Y, Ding M, Zhou X, Wang X. 2023. PTGDS  
1012 PROMOTES TUMORIGENESIS OF PERIPHERAL T CELL LYMPHOMA  
1013 THROUGH REGULATING IRON METABOLISM. *Hematol Oncol* **41**:625–625.  
1014 doi:10.1002/HON.3165\_475
- 1015 Hu Shunfeng, Liu B, Shang J, Lu T, Ding M, Zhou X, Wang X. 2023. P1210:  
1016 TARGETING PTGDS AS A NOVEL THERAPEUTIC APPROACH IN  
1017 PERIPHERAL T CELL LYMPHOMA THROUGH REGULATING IRON  
1018 METABOLISM. *HemaSphere* **7**:e6034196.  
1019 doi:10.1097/01.HS9.0000971736.60341.96
- 1020 Hu S, Ren S, Cai Y, Liu J, Han Y, Zhao Y, Yang J, Zhou X, Wang X. 2021. Glycoprotein  
1021 PTGDS promotes tumorigenesis of diffuse large B-cell lymphoma by MYH9-  
1022 mediated regulation of Wnt– $\beta$ -catenin–STAT3 signaling. *Cell Death Differ* **2021**  
1023 **29**:642–656. doi:10.1038/s41418-021-00880-2
- 1024 Hu X, Zhang H. 2019. Doxorubicin-Induced Cancer Cell Senescence Shows a Time  
1025 Delay Effect and Is Inhibited by Epithelial-Mesenchymal Transition (EMT). *Med*  
1026 *Sci Monit* **25**:3617–3623. doi:10.12659/MSM.914295
- 1027 Hunter JG, Van Delft MF, Rachubinski RA, Capone JP. 2001. Peroxisome Proliferator-  
1028 activated Receptor  $\gamma$  Ligands Differentially Modulate Muscle Cell Differentiation  
1029 and MyoD Gene Expression via Peroxisome Proliferator-activated Receptor  $\gamma$ -  
1030 dependent and -independent Pathways. *J Biol Chem* **276**:38297–38306.  
1031 doi:10.1074/JBC.M103594200
- 1032 Irikura D, Aritake K, Nagata N, Maruyama T, Shimamoto S, Urade Y. 2009.  
1033 Biochemical, Functional, and Pharmacological Characterization of AT-56, an  
1034 Orally Active and Selective Inhibitor of Lipocalin-type Prostaglandin D Synthase.  
1035 *J Biol Chem* **284**:7623–7630. doi:10.1074/JBC.M808593200
- 1036 Johnson-Arbor K, Dubey R. 2022. Doxorubicin. *xPharm Compr Pharmacol Ref* 1–5.  
1037 doi:10.1016/B978-008055232-3.61650-2

- 1038 Jones KR, Elmore LW, Jackson-Cook C, Demasters G, Povirk LF, Holt SE, Gewirtz  
1039 DA. 2005. p53-dependent accelerated senescence induced by ionizing radiation  
1040 in breast tumour cells. *Int J Radiat Biol* **81**:445–458.  
1041 doi:10.1080/09553000500168549
- 1042 Kirsten WH, Mayer LA. 1967. Morphologic Responses to a Murine Erythroblastosis  
1043 Virus. *JNCI J Natl Cancer Inst* **39**:311–335. doi:10.1093/JNCI/39.2.311
- 1044 Konieczny SF, Drobles BL, Menke SL, Taparowsky EJ. 1989. Inhibition of myogenic  
1045 differentiation by the H-ras oncogene is associated with the down regulation of  
1046 the MyoD1 gene. *Oncogene* **4**:473–481.
- 1047 Krtolica A, Parrinello S, Lockett S, Desprez PY, Campisi J. 2001. Senescent  
1048 fibroblasts promote epithelial cell growth and tumorigenesis: A link between  
1049 cancer and aging. *Proc Natl Acad Sci U S A* **98**:12072–12077.  
1050 doi:10.1073/pnas.211053698
- 1051 Land H, Parada LF, Weinberg RA. 1983. Tumorigenic conversion of primary embryo  
1052 fibroblasts requires at least two cooperating oncogenes. *Nature* **304**:596–602.  
1053 doi:10.1038/304596a0
- 1054 Lassar AB, Thayer MJ, Overell RW, Weintraub H. 1989. Transformation by activated  
1055 ras or fos prevents myogenesis by inhibiting expression of MyoD1. *Cell* **58**:659–  
1056 667. doi:10.1016/0092-8674(89)90101-3
- 1057 Lee BY, Han JA, Im JS, Morrone A, Johung K, Goodwin EC, Kleijer WJ, DiMaio D,  
1058 Hwang ES. 2006. Senescence-associated  $\beta$ -galactosidase is lysosomal  $\beta$ -  
1059 galactosidase. *Aging Cell* **5**:187–195. doi:10.1111/j.1474-9726.2006.00199.x
- 1060 Lee J, Choi KJ, Lim MJ, Hong F, Choi TG, Tak E, Lee S, Kim YJ, Chang SG, Cho JM,  
1061 Ha J, Kim SS. 2010. Proto-oncogenic H-Ras, K-Ras, and N-Ras are involved in  
1062 muscle differentiation via phosphatidylinositol 3-kinase. *Cell Res* **20**:919–934.  
1063 doi:10.1038/cr.2010.92
- 1064 Li J, Guo C, Wu J. 2019. 15-Deoxy- $\Delta$ -12,14-Prostaglandin J2 (15d-PGJ2), an  
1065 Endogenous Ligand of PPAR- $\gamma$ : Function and Mechanism. *PPAR Res* **2019**.  
1066 doi:10.1155/2019/7242030
- 1067 Livak KJ, Schmittgen TD. 2001. Analysis of Relative Gene Expression Data Using

- 1068 Real-Time Quantitative PCR and the 2- $\Delta\Delta$ CT Method. *Methods* 25:402–408.  
1069 doi:10.1006/METH.2001.1262
- 1070 Lorentzen A, Kinkhabwala A, Rocks O, Vartak N, Bastiaens PIH. 2010. Regulation of  
1071 Ras localization by acylation enables a mode of intracellular signal propagation.  
1072 *Sci Signal* **3**.  
1073 doi:10.1126/SCISIGNAL.20001370/SUPPL\_FILE/3\_RA68\_SM.PDF
- 1074 Lowe SW, Cepero E, Evan G. 2004. Intrinsic tumour suppression. *Nature* **432**:307–  
1075 315. doi:10.1038/nature03098
- 1076 Lu JY, Hofmann SL. 1995. Depalmitoylation of CAAX motif proteins. Protein structural  
1077 determinants of palmitate turnover rate. *J Biol Chem* **270**:7251–7256.  
1078 doi:10.1074/JBC.270.13.7251/ATTACHMENT/56A70B86-B9FE-4517-9BAB-  
1079 74A5749981A0/TBL1
- 1080 Luis Oliva J, Pé Rez-Sala D, Castrillo A, Martínez N, Cañ Ada ‡ FJ, Boscá L, Rojas  
1081 JM. 2003. The cyclopentenone 15-deoxy-12,14-prostaglandin J 2 binds to and  
1082 activates H-Ras.
- 1083 Marcone S, Fitzgerald DJ. 2013. Proteomic identification of the candidate target  
1084 proteins of 15-deoxy-delta12,14-prostaglandin J2. *Proteomics* **13**:2135–2139.  
1085 doi:10.1002/pmic.201200289
- 1086 Moiseeva V, Cisneros A, Sica V, Deryagin O, Lai Y, Jung S, Andrés E, An J, Segalés  
1087 J, Ortet L, Lukesova V, Volpe G, Benguria A, Dopazo A, Aznar-Benitah S, Urano  
1088 Y, del Sol A, Esteban MA, Ohkawa Y, Serrano AL, Perdiguero E, Muñoz-Cánoves  
1089 P. 2022. Senescence atlas reveals an aged-like inflamed niche that blunts muscle  
1090 regeneration. *Nat* 2022 6137942 613:169–178. doi:10.1038/s41586-022-05535-  
1091 x
- 1092 Morgenstern J, Fleming T, Kadiyska I, Brings S, Groener JB, Nawroth P, Hecker M,  
1093 Brune M. 2018. Sensitive mass spectrometric assay for determination of 15-  
1094 deoxy- $\Delta$ 12,14-prostaglandin J2 and its application in human plasma samples of  
1095 patients with diabetes. *Anal Bioanal Chem* **410**:521–528. doi:10.1007/s00216-  
1096 017-0748-1
- 1097 Noë S, Corvelyn M, Willems S, Costamagna D, Aerts JM, Van Campenhout A,

- 1098 Desloovere K. 2022. The Myotube Analyzer: how to assess myogenic features in  
1099 muscle stem cells. *Skelet Muscle* **12**:1–12. doi:10.1186/S13395-022-00297-  
1100 6/FIGURES/10
- 1101 Olson, EN, Spizz G, Tainsky MA. 1987. The oncogenic forms of N-ras or H-ras  
1102 prevent skeletal myoblast differentiation. *Mol Cell Biol* **7**:2104–2111.  
1103 doi:10.1128/MCB.7.6.2104-2111.1987
- 1104 Parrinello S, Coppe JP, Krtolica A, Campisi J. 2005. Stromal-epithelial interactions in  
1105 aging and cancer: Senescent fibroblasts alter epithelial cell differentiation. *J Cell*  
1106 *Sci* **118**:485–496. doi:10.1242/jcs.01635
- 1107 Pylayeva-Gupta Y, Grabocka E, Bar-Sagi D. 2011. RAS oncogenes: weaving a  
1108 tumorigenic web. *Nat Rev Cancer* 2011 1111 **11**:761–774. doi:10.1038/nrc3106
- 1109 Robles SJ, Adami GR. 1998. Agents that cause DNA double strand breaks lead to  
1110 p16(INK4a) enrichment and the premature senescence of normal fibroblasts.  
1111 *Oncogene* **16**:1113–1123. doi:10.1038/sj.onc.1201862
- 1112 Rocks O, Peyker A, Kahms M, Verveer PJ, Koerner C, Lumbierres M, Kuhlmann J,  
1113 Waldmann H, Wittinghofer A, Bastiaens PIH. 2005. An acylation cycle regulates  
1114 localization and activity of palmitoylated ras isoforms. *Science (80- )* **307**:1746–  
1115 1752. doi:10.1126/science.1105654
- 1116 Rommel C, Clarke BA, Zimmermann S, Nuñez L, Rossman R, Reid K, Moelling K,  
1117 Yancopoulos GD, Glass DJ. 1999. Differentiation stage-specific inhibition of the  
1118 Raf-MEK-ERK pathway by Akt. *Science (80- )* **286**:1738–1741.  
1119 doi:10.1126/SCIENCE.286.5445.1738
- 1120 Santra T, Herrero A, Rodriguez J, von Kriegsheim A, Iglesias-Martinez LF, Schwarzl  
1121 T, Higgins D, Aye TT, Heck AJR, Calvo F, Agudo-Ibáñez L, Crespo P, Matallanas  
1122 D, Kolch W. 2019. An Integrated Global Analysis of Compartmentalized HRAS  
1123 Signaling. *Cell Rep* **26**:3100-3115.e7. doi:10.1016/J.CELREP.2019.02.038
- 1124 Scholz ME, Meissner JD, Scheibe RJ, Umeda PK, Chang KC, Gros G, Kubis HP.  
1125 2009. Different roles of H-ras for regulation of myosin heavy chain promoters in  
1126 satellite cell-derived muscle cell culture during proliferation and differentiation. *Am*  
1127 *J Physiol - Cell Physiol* **297**:1012–1018.

- 1128 doi:10.1152/AJPCELL.00567.2008/ASSET/IMAGES/LARGE/ZH001009605700  
1129 06.JPEG
- 1130 Serrano M, Lin AW, McCurrach ME, Beach D, Lowe SW. 1997. Oncogenic ras  
1131 provokes premature cell senescence associated with accumulation of p53 and  
1132 p16(INK4a). *Cell*. doi:10.1016/S0092-8674(00)81902-9
- 1133 Shaner NC, Lin MZ, McKeown MR, Steinbach PA, Hazelwood KL, Davidson MW,  
1134 Tsien RY. 2008. Improving the photostability of bright monomeric orange and red  
1135 fluorescent proteins. *Nat Methods* 2008 5:545–551. doi:10.1038/nmeth.1209
- 1136 Shelton DN, Chang E, Whittier PS, Choi D, Funk WD. 1999. Microarray analysis of  
1137 replicative senescence. *Curr Biol* 9:939–945. doi:10.1016/S0960-  
1138 9822(99)80420-5
- 1139 Shibata T, Kondo M, Osawa T, Shibata N, Kobayashi M, Uchida K. 2002. 15-Deoxy-  
1140  $\Delta$ 12,14-prostaglandin J2. *J Biol Chem* 277:10459–10466.  
1141 doi:10.1074/jbc.m110314200
- 1142 Slanovc J, Mikulčić M, Jahn N, Wizsy NGT, Sattler W, Malle E, Hrzenjak A. 2024.  
1143 Prostaglandin 15d-PGJ2 inhibits proliferation of lung adenocarcinoma cells by  
1144 inducing ROS production and activation of apoptosis via sirtuin-1. *Biochim*  
1145 *Biophys acta Mol basis Dis* 1870. doi:10.1016/J.BBADIS.2023.166924
- 1146 Smuder AJ, Kavazis AN, Min K, Powers SK. 2011. Exercise protects against  
1147 doxorubicin-induced oxidative stress and proteolysis in skeletal muscle. *J Appl*  
1148 *Physiol* 110:935–942.  
1149 doi:10.1152/JAPPLPHYSIOL.00677.2010/ASSET/IMAGES/LARGE/ZDG004119  
1150 5300006.JPEG
- 1151 Stein GH, Beeson M, Gordon L. 1990. Failure to phosphorylate the retinoblastoma  
1152 gene product in senescent human fibroblasts. *Science (80- )* 249:666–669.  
1153 doi:10.1126/science.2166342
- 1154 Van Der Burgt I, Kupsky W, Stassou S, Nadroo A, Barroso C, Diem A, Kratz CP,  
1155 Dvorsky R, Ahmadian MR, Zenker M. 2007. Myopathy caused by HRAS germline  
1156 mutations: implications for disturbed myogenic differentiation in the presence of  
1157 constitutive HRas activation. *J Med Genet* 44:459–462.

- 1158 doi:10.1136/JMG.2007.049270
- 1159 Veliça P, Khanim FL, Bunce CM. 2010. Prostaglandin D2 inhibits C2C12 myogenesis.  
1160 *Mol Cell Endocrinol* **319**:71–78. doi:10.1016/J.MCE.2010.01.023
- 1161 Vetter IR, Wittinghofer A. 2001. The guanine nucleotide-binding switch in three  
1162 dimensions. *Science* (80- ) **294**:1299–1304.  
1163 doi:10.1126/SCIENCE.1062023/ASSET/0AB072BE-F662-4796-8B33-  
1164 AFF3C6AD829F/ASSETS/GRAPHIC/SE4419929006.JPEG
- 1165 Wang X, Spandidos A, Wang H, Seed B. 2012. PrimerBank: A PCR primer database  
1166 for quantitative gene expression analysis, 2012 update. *Nucleic Acids Res* **40**.  
1167 doi:10.1093/NAR/GKR1013
- 1168 Wiley CD, Campisi J. 2021. The metabolic roots of senescence: mechanisms and  
1169 opportunities for intervention. *Nat Metab* **2021 310 3**:1290–1301.  
1170 doi:10.1038/s42255-021-00483-8
- 1171 Wiley CD, Campisi J. 2016. From Ancient Pathways to Aging Cells - Connecting  
1172 Metabolism and Cellular Senescence. *Cell Metab.*  
1173 doi:10.1016/j.cmet.2016.05.010
- 1174 Wiley CD, Sharma R, Davis SS, Lopez-Dominguez JA, Mitchell KP, Wiley S, Alimirah  
1175 F, Kim DE, Payne T, Rosko A, Aimontche E, Deshpande SM, Neri F,  
1176 Kuehnemann C, Demaria M, Ramanathan A, Campisi J. 2021. Oxylipin  
1177 biosynthesis reinforces cellular senescence and allows detection of senolysis.  
1178 *Cell Metab* **33**:1124-1136.e5. doi:10.1016/j.cmet.2021.03.008
- 1179 Wiley CD, Velarde MC, Lecot P, Liu S, Sarnoski EA, Freund A, Shirakawa K, Lim HW,  
1180 Davis SS, Ramanathan A, Gerencser AA, Verdin E, Campisi J. 2016.  
1181 Mitochondrial dysfunction induces senescence with a distinct secretory  
1182 phenotype. *Cell Metab* **23**:303–314. doi:10.1016/j.cmet.2015.11.011
- 1183 Woods D, Parry D, Cherwinski H, Bosch E, Lees E, McMahon M. 1997. Raf-Induced  
1184 Proliferation or Cell Cycle Arrest Is Determined by the Level of Raf Activity with  
1185 Arrest Mediated by p21 Cip1. *Mol Cell Biol* **17**:5598–5611.
- 1186 Yamamoto Y, Takase K, Kishino J, Fujita M, Okamura N, Sakaeda T, Fujimoto M,  
1187 Yagami T. 2011. Proteomic Identification of Protein Targets for 15-Deoxy- $\Delta$ 12,14-

- 1188 Prostaglandin J2 in Neuronal Plasma Membrane. *PLoS One* **6**:e17552.  
1189 doi:10.1371/JOURNAL.PONE.0017552
- 1190 Yang G, Rosen DG, Zhang Z, Bast RC, Mills GB, Colacino JA, Mercado-Uribe I, Liu  
1191 J. 2006. The chemokine growth-regulated oncogene 1 (Gro-1) links RAS signaling  
1192 to the senescence of stromal fibroblasts and ovarian tumorigenesis. *Proc Natl*  
1193 *Acad Sci U S A* **103**:16472–16477. doi:10.1073/pnas.0605752103
- 1194 Yen CC, Hsiao C Der, Chen WM, Wen YS, Lin YC, Chang TW, Yao FY, Hung SC,  
1195 Wang JY, Chiu JH, Wang HW, Lin CH, Chen TH, Chen PCH, Liu CL, Tzeng CH,  
1196 Fletcher JA. 2014. Cytotoxic effects of 15d-PGJ2 against osteosarcoma through  
1197 ROS-mediated AKT and cell cycle inhibition. *Oncotarget* **5**:716.  
1198 doi:10.18632/ONCOTARGET.1704
- 1199 Zindy F, Williams RT, Baudino TA, Rehg JE, Skapek SX, Cleveland JL, Roussel MF,  
1200 Sherr CJ. 2003. Arf tumor suppressor promoter monitors latent oncogenic signals  
1201 in vivo. *Proc Natl Acad Sci U S A* **100**:15930–15935.  
1202 doi:10.1073/pnas.2536808100
- 1203 Zwerschke W, Mazurek S, Stöckl P, Hütter E, Eigenbrodt E, Jansen-Dürr P. 2003.  
1204 Metabolic analysis of senescent human fibroblasts reveals a role for AMP in  
1205 cellular senescence. *Biochem J* **376**:403–411. doi:10.1042/BJ20030816
